# Supplementary material for: The Development of a Novel High Throughput Computational Tool for Studying Individual and Collective Cellular Migration
Source: PLoS One. 2013 Dec 27;8(12):e82444. doi: 10.1371/journal.pone.0082444 (PMC3873918; doi:10.1371/journal.pone.0082444)
Supplement: Data S2 — A sample output from Pathfinder. A sheet of HaCaT H2B-mCherry cells were analyzed for individual cell migration from a microscopy video between 22 and 25.5 hours post 100 nM EGF stimulation. Frames were acquired every 7 minutes. Analysis was conducted with a frame binning of 3 frames (21 minutes). (XLSX) [file pone.0082444.s002.xlsx]

## Sheet: well G03-8_Analysis
Cell_ID_Number	Frame_Number	X_Position(Pixels)	Y_Position(Pixels)	Displacement (Pixels)	Angle of Trajectory (Degrees)	Angle of Deflection (Degrees)	Overlapping MSD (pixels^2)		Frame_Number	Average Displacement (Pixels)	Average Angle of Trajectory (Degrees)	Turning Greater Than 90 Degrees (Percent)	Average Angle of Deflection (Degrees)		Degree	%_of_Cell_Pop		Total Number of Cells: 595
1	1	5.11977	1.16483	0.14011	179.369		0.678414		1	1.82086	271.082	0	0		0	0.225002
1	2	4.70073	1.07921	0.127829	12.0132	-167.356	1.1142		2	1.64329	271.876	11.1979	32.7458		1	0.216002
1	3	4.66851	1.15175	0.228842	14.1106	2.09741	1.14847		3	1.58624	267.668	7.65306	28.3185		2	0.171002
1	4	4.69947	1.1602	0.308803	38.9946	24.884	0.979384		4	1.71859	268.536	7.94045	27.6448		3	0.126001
1	5	5.07582	0.999395	0.173396	356.858	-42.1367	1.16338		5	1.70158	266.491	7.56098	26.4914		4	0.153002
1	6	5.33432	0.984383	0.190273	7.56208	10.7042	1.6049		6	1.63394	268.878	8.63309	28.197		5	0.180002
1	7	5.41948	0.577258	0.22666	329.159	-38.4036	1.60912		7	1.69885	270.472	6.97674	26.8475		6	0.171002
1	8	5.59522	1.02791	0.222266	43.8841	74.7256	1.83484		8	1.60113	269.18	6.40732	25.2548		7	0.162002
1	9	5.90018	0.909263	0.0718366	341.858	-62.0264	2.09217		9	1.72667	272.053	7.76256	27.9067		8	0.144001
1	10	6.0033	0.925859	0.123212	359.757	17.8994	2.21168		10	1.67077	274.425	8.16327	26.4997		9	0.117001
1	11	6.07581	0.565683	0.442126	172.414	172.657	2.31273		11	1.90812	269.108	13.8952	42.7747		10	0.126001
1	12	6.10497	0.976368	0.313697	43.1542	-129.26	2.22927		12	1.81274	274.71	10.5747	36.3299		11	0.108001
1	13	6.37294	0.927426	0.295536	33.4603	-9.69389	2.25236		13	1.96859	273.541	5.34884	23.8025		12	0.117001
1	14	4.76104	0.390589	0.731895	346.949	-46.5115	2.38583		14	2.06683	279.537	8.80952	33.2087		13	0.180002
1	15	6.79151	0.332695	0.72272	196.313	-150.635	2.28614		15	2.16348	264.772	18.4758	49.8448		14	0.099001
1	16	7.11261	0.438587	0.811128	189.424	-6.88963	2.18283		16	1.97533	263.86	3.75587	19.2802		15	0.0810008
1	17	6.90001	0.886424	0.0970508	99.6343	-89.7894	2.01066		17	1.94735	277.949	9.63855	36.2389		16	0.0630006
1	18	4.71064	0.941709	0.506818	357.304	-102.33	2.48967		18	1.89353	285.966	11.7096	37.6827		17	0.135001
1	19	4.71206	0.837014	0.555859	353.809	-3.49524	2.95844		19	1.9489	282.253	4.43925	19.7767		18	0.108001
1	20	6.85128	0.599378	0.122246	261.711	-92.0973	3.16135		20	1.66223	272.686	10.4623	36.9613		19	0.144001
1	21	6.22941	1.01323	0.173523	348.788	87.0766	3.70648		21	1.6933	271.341	6.2201	24.1578		20	0.099001
1	22	6.36991	1.01686	0.177455	336.021	-12.767	4.19456		22	1.5596	273.734	9.87952	28.3239		21	0.0450005
1	23	6.79841	0.962285	0.260039	264.177	-71.8444	4.61168		23	1.48852	275.422	7.5188	28.0975		22	0.099001
1	24	6.74005	1.11445	0.311417	292.43	28.2529	4.96908		24	1.53351	274.302	5.34351	22.5551		23	0.099001
1	25	6.85633	1.23321	0.3644	287.604	-4.82572	5.50838		25	1.65942	275.422	6.70241	27.2262		24	0.0450005
1	26	6.71926	1.73838	0.149344	326.327	38.723	6.03141		26	1.75874	271.708	9.58904	29.326		25	0.0270003
1	27	7.09651	1.97802	0.0753187	143.673	177.347	5.85746		27	1.89134	272.601	7.5	26.4064		26	0.0630006
1	28	7.18695	2.27522				5.02577		28	NaN	NaN	NaN	NaN		27	0.0630006
1	29	7.09212	1.98679				3.68241		29	NaN	NaN	NaN	NaN		28	0.0450005
1	30	6.91446	1.84417						30	NaN	NaN	NaN	NaN		29	0.0450005
2	1	34.5872	0.368943	0.0647871	50.819		1.40463								30	0.0630006
2	2	34.5871	0.36307	0.0398094	38.407	-12.412	2.76556								31	0.0540005
2	3	34.5851	0.358886	0.0142118	111.692	73.2853	3.88634								32	0.0450005
2	4	34.71	0.218283	0.132342	223.932	112.239	3.88519								33	0.0540005
2	5	34.6807	0.288876	0.236889	191.011	-32.921	4.23912								34	0.0450005
2	6	34.5693	0.31927	0.275976	199.634	8.62361	5.33623								35	0.0450005
2	7	34.4241	0.49374	0.201519	225.071	25.4372	5.91572								36	0.0360004
2	8	33.9831	0.424606	0.0928968	247.618	22.5464	6.39046								37	0.0540005
2	9	33.7895	0.597464	0.127384	324.529	76.9109	7.71239								38	0.0720007
2	10	33.9971	0.921757	0.132651	93.1492	128.621	9.31728								39	0.0450005
2	11	33.877	0.682301	0.552479	173.995	80.8459	10.1792								40	0.0270003
2	12	34.1008	0.819225	0.174945	58.1665	-115.829	9.38794								41	0.0630006
2	13	33.9753	0.524406	0.173485	13.5765	-44.59	8.48494								42	0.0270003
2	14	32.2286	0.50891	0.697532	3.99407	-9.58247	9.80898								43	0.0540005
2	15	34.3776	0.373334	0.684832	183.131	179.137	10.7288								44	0.0270003
2	16	34.4812	0.402232	0.685992	180.163	-2.96767	11.5414								45	0.0810008
2	17	34.3161	0.363154	0.0837117	3.3502	-176.813	10.4698								46	0.0270003
2	18	32.3262	0.485549	0.876044	3.85677	0.506577	10.5782								47	0.0630006
2	19	32.4232	0.408099	0.823828	7.01331	3.15654	11.3315								48	0.0630006
2	20	34.5668	0.348478	0.171737	10.3207	3.30741	12.2077								49	0.0810008
2	21	34.9483	0.308774	0.127649	11.996	1.67529	13.2024								50	0.0540005
2	22	34.8762	0.106331	0.302567	350.258	-21.738	13.895								51	0.0180002
2	23	35.0737	0.256174	0.109991	347.954	-2.3043	14.8005								52	0.0450005
2	24	35.3229	0.229181	0.0770346	339.049	-8.90458	16.9322								53	0.0360004
2	25	35.7708	0.259924	1.49539	335.098	-3.95087	19.9843								54	0.0360004
2	26	35.3964	0.32504	1.6154	336.512	1.4136	25.023								55	0.0450005
2	27	35.5388	0.311816	1.78154	326.161	-10.3504	33.2041								56	0.0270003
2	28	39.8399	2.14888				34.3918								57	0.0270003
2	29	39.8411	2.25654				37.5817								58	0.0450005
2	30	39.978	3.28798												59	0.0540005
3	1	1.11174	1.42712	0.0321273	140.786		1.20261								60	0.0540005
3	2	0.95294	1.38376	0.265067	341.9	-158.886	2.36605								61	0.0450005
3	3	1.03707	1.36619	0.146368	30.9433	49.0435	2.50508								62	0.0180002
3	4	1.03707	1.36619	0.139819	13.5842	-17.3591	2.48788								63	0.0270003
3	5	1.70879	1.63081	0.154118	114.371	100.787	2.70925								64	0.00900009
3	6	1.41368	1.14041	0.276684	330.627	-143.743	2.98929								65	0.0270003
3	7	1.44479	1.26767	0.251503	348.754	18.1261	3.13797								66	0.0540005
3	8	1.51801	1.20965	0.120609	297.055	-51.6982	3.25904								67	0.0270003
3	9	2.13702	1.54754	0.0186143	219.005	-78.0502	3.56044								68	0.0360004
3	10	2.18481	1.41482	0.147412	269.112	50.1074	4.14791								69	0.0450005
3	11	1.68258	1.53188	0.60415	210.165	-58.9477	4.83643								70	0.0540005
3	12	2.09363	1.58268	0.324063	261.874	51.7095	4.36542								71	0.0450005
3	13	2.17796	1.85701	0.18941	332.157	70.2828	3.61477								72	0.0450005
3	14	0.115568	2.44262	0.662137	355.627	23.4695	3.98637								73	0.0540005
3	15	1.95622	2.54511	0.620739	183.123	-172.504	5.41957								74	0.0630006
3	16	2.68041	2.1224	0.832435	189.063	5.9406	5.78609								75	0.0540005
3	17	2.09619	2.5941	0.211194	137.201	-51.862	5.11401								76	0.0270003
3	18	0.096762	2.64655	0.634111	20.8284	-116.373	5.85332								77	0.0540005
3	19	0.214282	2.51579	0.495607	14.3379	-6.49042	6.16642								78	0.0270003
3	20	1.63131	2.16362	0.16588	238.757	-135.581	6.45864								79	0.0450005
3	21	1.87478	1.97014	0.365961	249.149	10.3911	7.51128								80	0.0540005
3	22	1.65479	2.14759	0.467001	241.146	-8.00214	9.09565								81	0.0540005
3	23	1.3732	2.5891	0.357996	257.831	16.6845	10.0893								82	0.0540005
3	24	1.48399	2.99612	0.265025	254.252	-3.57862	10.967								83	0.0630006
3	25	0.978703	3.37466	0.254912	300.274	46.0216	12.5668								84	0.0630006
3	26	1.1468	3.63895	1.38147	359.787	59.513	16.1484								85	0.0450005
3	27	1.2682	3.76135	1.39158	350.011	-9.77628	19.81								86	0.0180002
3	28	1.36423	4.03511				25.8227								87	0.0450005
3	29	5.2912	3.65437				27.569								88	0.0720007
3	30	5.37966	4.48553												89	0.0540005
4	1	11.9661	3.34395	0.860979	274.538		1.22491								90	0.0900009
4	2	11.968	6.13383	0.0763528	348.68	74.1412	1.49367								91	0.0270003
4	3	12.0399	6.13153	0.458246	222.1	-126.58	1.63986								92	0.0540005
4	4	12.1705	5.91879	0.319275	255.364	33.2639	2.27775								93	0.0900009
4	5	12.1926	6.17879	0.329637	255.976	0.612729	3.65171								94	0.0270003
4	6	11.0198	7.05319	0.320932	0.370629	104.394	3.84646								95	0.0360004
4	7	11.9285	6.84553	0.0688839	293.145	-67.2257	5.34964								96	0.0630006
4	8	11.953	7.13823				7.2637								97	0.0360004
4	9	11.9826	7.04696				13.6298								98	0.0360004
4	10	12.0097	7.03555												99	0.0270003
5	1	33.5248	4.30994	0.0737767	119.429		1.55764								100	0.0450005
5	2	33.5009	4.32948	0.134712	154.367	34.9379	3.05929								101	0.0180002
5	3	33.4423	4.31234	0.167942	157.652	3.2853	4.24688								102	0.00900009
5	4	33.4161	4.11717	0.190452	180.506	22.8538	5.19761								103	0.0270003
5	5	33.1365	4.15465	0.187924	175.835	-4.67111	5.95749								104	0.0540005
5	6	32.9763	4.12077	0.0984019	182.891	7.0558	7.83896								105	0.0810008
5	7	32.8447	4.12221	0.0737759	289.876	106.986	9.35081								106	0.0360004
5	8	32.5742	4.1137	0.194952	312.943	23.0669	11.0118								107	0.0360004
5	9	32.6815	4.13565	0.373879	304.735	-8.20844	12.7565								108	0.0180002
5	10	32.92	4.33035	0.280264	296.927	-7.80802	14.4696								109	0.0450005
5	11	32.9727	4.54183	0.81237	194.755	-102.172	16.2545								110	0.0180002
5	12	33.3206	5.05742	0.253468	180.113	-14.6424	17.844								111	0.0450005
5	13	33.3007	5.07999	0.24682	173.479	-6.63373	20.0397								112	0.0720007
5	14	30.616	5.16254	0.566439	10.0587	-163.42	21.5333								113	0.0450005
5	15	32.5602	5.05891	0.994583	177.722	167.664	23.8985								114	0.0360004
5	16	32.5651	4.9959	2.38848	201.146	23.4234	26.313								115	0.0180002
5	17	32.2891	4.86574	1.65126	207.584	6.43803	29.8079								116	0.0180002
5	18	29.5788	4.94033	0.929727	231.637	24.053	31.6313								117	0.0270003
5	19	25.8821	7.58077	0.737629	15.4251	143.788	28.932								118	0.0270003
5	20	27.8984	7.15956	0.233619	17.9521	2.52702	28.5856								119	0.0450005
5	21	27.8477	7.12731	0.290502	356.679	-21.2732	27.9761								120	0.0450005
5	22	28.0153	6.99219	0.245876	350.601	-6.07755	27.5077								121	0.00900009
5	23	28.5652	6.94354	0.130691	302.818	-47.7831	27.7913								122	0.0450005
5	24	28.7177	7.17779	0.122046	348.239	45.4204	27.8875								123	0.0360004
5	25	28.743	7.11264	0.145071	351.806	3.56767	27.9233								124	0.0360004
5	26	28.7777	7.27304	0.307064	336.545	-15.2612	27.5704								125	0.0630006
5	27	29.0762	7.25242	0.252828	305.042	-31.5034	27.089								126	0.00900009
5	28	29.1738	7.17467				27.3934								127	0.0360004
5	29	29.6227	7.6397				28.8037								128	0.0540005
5	30	29.5117	7.87342												129	0.0180002
6	1	0.306187	5.53153	0.0976752	213.888		0.314061								130	0.0180002
6	2	0.185941	5.86989	0.088745	22.3245	168.436	0.467084								131	0.0180002
6	3	0.214509	5.68091	0.108496	74.2349	51.9104	0.599								132	0.0360004
6	4	0.062938	5.69492	0.178731	27.5344	-46.7005	0.812949								133	0.0180002
6	5	0.432221	5.76876	0.275383	27.0141	-0.520276	0.985853								134	0.0360004
6	6	0.302942	5.36766	0.256341	344	-43.0143	1.24866								135	0.0270003
6	7	0.538399	5.44704	0.0933343	337.437	-6.56284	1.32195								136	0.00900009
6	8	1.16823	5.39352	0.107352	208.963	-128.474	1.41276								137	0.0450005
6	9	1.04217	5.57964	0.111292	217.541	8.5774	1.5581								138	0.00900009
6	10	0.79697	5.55448	0.235491	300.634	83.0938	1.53641								139	0.00900009
6	11	0.886457	5.54947	0.657703	253.431	-47.2035	1.69396								140	0.0630006
6	12	0.777435	5.78308	0.364099	283.09	29.6587	1.76755								141	0.0810008
6	13	1.15696	6.16236	0.176222	264.469	-18.6209	2.15169								142	0.0540005
6	14	0.323781	7.44065	0.211723	73.1191	168.65	1.7256								143	0.0270003
6	15	1.02481	6.84699				1.50478								144	0.0540005
6	16	1.106	6.68856				1.73424								145	0.0180002
6	17	0.508224	6.83285												146	0.0360004
7	1	20.73	4.65363	1.94009	283.522		5.93022								147	0.0180002
7	2	21.0342	2.38808	2.63485	281.407	-2.11485	15.1261								148	0.0180002
7	3	20.9989	2.40992	2.85348	282.525	1.11813	26.3766								149	0.00900009
7	4	22.0909	10.3126	1.40532	288.242	5.71664	40.0697								150	0.0450005
7	5	22.5976	10.1365	1.46899	280.574	-7.66753	55.1471								151	0.0540005
7	6	22.8554	10.7666	1.2286	274.888	-5.68631	71.0936								152	0.0450005
7	7	23.4106	14.3166	0.11223	196.396	-78.4916	86.8952								153	0.0360004
7	8	23.4063	14.4686	0.184483	224.766	28.3692	104.845								154	0.0720007
7	9	23.1695	14.439	0.218815	234.065	9.29973	125.1								155	0.0540005
7	10	23.0876	14.4117	1.06966	348.932	114.867	148.09								156	0.0360004
7	11	23.0133	14.8584	0.810897	339.609	-9.32345	173.365								157	0.0630006
7	12	22.7842	14.9705	1.37403	355.358	15.7499	201.834								158	0.0450005
7	13	26.2369	15.0277	0.284598	328.15	-27.2085	230.343								159	0.0360004
7	14	25.2936	15.706	0.617461	3.46928	35.3193	257.767								160	0.0360004
7	15	26.8928	15.3041	1.76616	298.25	-65.2195	293.249								161	0.0540005
7	16	26.9621	15.4783	3.20537	293.708	-4.54149	338.299								162	0.0360004
7	17	27.1426	15.5939	4.7892	286.019	-7.68918	394.048								163	0.0720007
7	18	29.4007	19.9715	3.2716	286.452	0.432998	444.774								164	0.0270003
7	19	30.8285	24.2828	1.7812	289.615	3.16267	481.415								165	0.0450005
7	20	31.1074	29.4036	0.350076	4.03603	74.4213	502.174								166	0.0810008
7	21	32.1803	29.3844	0.0184693	76.3412	72.3052	523.805								167	0.0360004
7	22	32.6224	29.3163	0.158283	189.258	112.917	550.231								168	0.0540005
7	23	32.1551	29.3297	0.029395	225.843	36.5849	586.43								169	0.0810008
7	24	32.1934	29.3306	0.039174	202.663	-23.1803	633.786								170	0.0720007
7	25	32.1537	29.3927	0.135058	28.1139	-174.549	673.447								171	0.0720007
7	26	32.0936	29.3929	0.0956029	26.7562	-1.3577	726.273								172	0.117001
7	27	32.085	29.3759	0.0912549	23.1239	-3.63237	813.892								173	0.0810008
7	28	32.5111	29.2018				795.489								174	0.0720007
7	29	32.3497	29.2638				740.603								175	0.117001
7	30	32.3367	29.2684												176	0.0900009
8	1	39.6689	5.95614	0.489099	176.601		6.70287								177	0.099001
8	2	39.1366	5.88459	0.160373	183.914	7.31302	17.0129								178	0.0810008
8	3	38.8348	5.83402	0.0851947	218.125	34.2118	30.0717								179	0.108001
8	4	38.2042	5.86914	0.190863	13.5018	155.376	43.9187								180	0.117001
8	5	38.6566	5.91742	0.14039	211.053	-162.449	59.3273								181	0.135001
8	6	38.6337	5.99182	0.144236	169.686	-41.3674	73.2954								182	0.135001
8	7	38.761	5.73545	0.384871	233.493	63.8071	89.8895								183	0.144001
8	8	38.2958	6.13468	0.280272	262.952	29.4594	111.719								184	0.0810008
8	9	38.208	5.91434	2.51387	247.028	-15.9237	141.86								185	0.171002
8	10	38.0741	6.66351	2.18059	248.739	1.71081	176.077								186	0.0810008
8	11	38.1927	6.96914	2.57786	231.298	-17.4411	215.852								187	0.162002
8	12	35.2647	12.8579	0.0358712	234.274	2.9763	249.878								188	0.225002
8	13	35.7019	12.76	0.083184	298.967	64.693	270.539								189	0.135001
8	14	33.3571	13.0045	0.788966	344.223	45.2551	294.833								190	0.126001
8	15	35.2019	12.9452	0.589355	212.229	-131.994	325.407								191	0.0810008
8	16	35.8228	12.9784	2.25095	310.311	98.082	359.116								192	0.162002
8	17	35.6348	13.6481	3.56011	300.276	-10.0353	393.288								193	0.162002
8	18	33.7062	13.8882	3.78127	307.807	7.53175	435.92								194	0.162002
8	19	40.1914	18.1277	1.56003	270.632	-37.1755	481.047								195	0.171002
8	20	41.0194	22.8717	0.250261	169.903	-100.729	504.048								196	0.162002
8	21	40.66	22.8506	0.211304	48.8914	-121.011	530.605								197	0.126001
8	22	40.243	22.8075	1.1	330.446	-78.4452	559.759								198	0.126001
8	23	40.2802	22.7401	2.58773	314.774	-15.6725	599.289								199	0.117001
8	24	41.0768	22.373	3.91835	317.745	2.97099	650.695								200	0.108001
8	25	43.1137	24.4352	3.1175	317.608	-0.13689	707.132								201	0.153002
8	26	45.7479	28.2511	1.81037	330.543	12.9351	744.447								202	0.171002
8	27	49.7774	30.2775	0.324475	302.534	-28.0087	748.888								203	0.189002
8	28	50.0209	30.7407				750.237								204	0.099001
8	29	50.4769	30.922				745.162								205	0.135001
8	30	50.3009	31.0982												206	0.171002
9	1	11.6752	6.64462	1.9428	354.283		1.60114								207	0.171002
9	2	16.2627	7.05031	0.352472	346.748	-7.5352	2.17067								208	0.288003
9	3	16.8387	6.91841	0.221245	318.432	-28.3163	2.57242								209	0.162002
9	4	17.4746	7.22518	0.120282	214.132	-104.3	2.85065								210	0.162002
9	5	17.292	7.29271	0.0286135	258.569	44.4375	3.18327								211	0.234002
9	6	17.3353	7.3588	0.114682	216.211	-42.3582	3.62955								212	0.234002
9	7	17.1759	7.42765	0.0450675	48.6322	-167.579	3.74172								213	0.207002
9	8	17.275	7.37685	0.401322	148.101	99.4693	4.01182								214	0.288003
9	9	17.0577	7.56205	0.170553	106.517	-41.5847	4.46788								215	0.225002
9	10	17.2653	7.32618	0.242601	11.2325	-95.2843	4.37495								216	0.315003
9	11	16.2528	6.74065	0.241218	244.843	-126.389	5.17791								217	0.243002
9	12	16.9122	7.07151	0.483435	349.417	104.573	5.77983								218	0.369004
9	13	17.9792	7.18441	0.173357	352.679	3.26202	5.12465								219	0.207002
9	14	15.9452	7.39567	0.768998	348.172	-4.50617	7.57889								220	0.306003
9	15	18.3378	7.33788	0.746706	195.938	-152.235	8.11145								221	0.270003
9	16	18.495	7.25069	0.800384	201.247	5.30974	8.50325								222	0.261003
9	17	18.2032	7.86852	0.187938	205.771	4.52329	6.97282								223	0.261003
9	18	16.1838	7.95299	0.443555	332.202	126.432	7.82162								224	0.315003
9	19	16.2571	8.12085	0.550157	355.669	23.4671	9.53385								225	0.342003
9	20	17.6955	8.11365	0.18955	320.568	-35.1018	9.37247								226	0.207002
9	21	17.3609	8.57355	0.348236	351.248	30.6802	10.959								227	0.333003
9	22	17.9028	8.24548	0.403555	4.49019	13.2424	12.6607								228	0.324003
9	23	18.1347	8.47484	0.326869	323.268	-41.2221	14.9183								229	0.387004
9	24	18.3935	8.73251	0.403007	313.614	-9.65425	18.1888								230	0.369004
9	25	19.1098	8.1507	0.404106	300.921	-12.6929	21.1863								231	0.297003
9	26	18.9206	9.06131	0.300086	288.463	-12.4581	26.2952								232	0.387004
9	27	19.2274	9.60785	0.0351644	141.444	-147.018	33.4925								233	0.360004
9	28	19.7327	9.19072				40.9604								234	0.315003
9	29	19.2057	9.91523				64.1922								235	0.378004
9	30	19.145	9.5421												236	0.540005
10	1	16.0311	7.1019	2.30859	43.4281		6.79124								237	0.549005
10	2	18.2822	0.212022	1.16003	322.947	-80.4814	14.0836								238	0.459005
10	3	19.2066	0.273403	1.0643	304.266	-18.6809	21.7042								239	0.612006
10	4	21.0609	2.34083	2.72964	281.436	-22.8299	32.0148								240	0.486005
10	5	21.0595	2.30898	2.92069	280.946	-0.490223	43.6854								241	0.540005
10	6	21.0043	2.91213	2.81226	280.598	-0.347796	53.0415								242	0.531005
10	7	22.6845	10.3672	0.236588	225.996	-54.6014	66.5456								243	0.666007
10	8	22.7233	10.9117	0.0168321	13.7123	147.716	81.0488								244	0.630006
10	9	22.556	11.205	0.107755	79.6165	65.9042	97.3367								245	0.756008
10	10	22.1914	10.8777	1.38763	280.051	-159.565	116.785								246	0.720007
10	11	22.7723	10.8997	1.51614	248.172	-31.8797	137.755								247	0.621006
10	12	22.6142	10.887	1.31078	275.177	27.0056	158.688								248	0.882009
10	13	22.918	14.9767	0.0686266	38.5028	123.326	179.211								249	0.810008
10	14	21.0811	15.122	0.624294	0.888803	-37.614	202.205								250	0.693007
10	15	22.9691	14.8033	0.727122	336.564	-24.3249	228.158								251	0.909009
10	16	23.0791	14.8485	2.78379	317.964	-18.5997	260.862								252	0.828008
10	17	22.9538	15.0929	3.24254	329.624	11.6595	296.486								253	1.01701
10	18	24.9705	15.6709	2.62269	323.595	-6.02835	334.249								254	1.02601
10	19	29.2819	20.4406	0.879463	347.955	24.3601	356.101								255	1.04401
10	20	31.346	20.012	0.243207	298.513	-49.4423	377.239								256	0.99001
10	21	31.303	20.3405	0.305386	338.881	40.3682	400.648								257	0.95401
10	22	31.8622	20.9911	0.385731	29.6168	50.7355	428.288								258	0.99001
10	23	31.6943	20.6531	0.422399	13.2716	-16.3452	466.289								259	1.01701
10	24	32.1577	20.6706	0.219103	9.93091	-3.3407	513.277								260	0.738007
10	25	32.8682	20.4193	0.106123	237.408	-132.523	526.821								261	0.774008
10	26	32.9276	20.3622	0.156075	248.599	11.1919	541.216								262	0.98101
10	27	32.8051	20.5572	0.0467304	220.098	-28.5018	564.244								263	1.02601
10	28	32.6967	20.6875				546.378								264	1.18801
10	29	32.7568	20.7981				461.265								265	1.09801
10	30	32.6979	20.6475												266	1.16101
11	1	28.9873	6.787	0.199303	173.012		1.15863								267	1.23301
11	2	28.7217	6.74845	0.209122	141.916	-31.0953	2.40124								268	1.38601
11	3	28.6609	6.77366	0.247959	125.407	-16.509	3.27743								269	1.51202
11	4	28.3939	6.71426	0.196231	105.316	-20.0913	3.92256								270	1.66502
11	5	28.2279	6.36149	0.0294923	113.418	8.10204	4.79272								271	1.50302
11	6	28.2299	6.16736	0.197648	303.612	-169.806	6.24347								272	1.40401
11	7	28.2384	6.14647	0.215105	298.327	-5.28524	7.63225								273	1.33201
11	8	28.1927	6.2803	0.2366	305.065	6.73813	9.17859								274	1.38601
11	9	28.5582	6.66117	0.109203	314.004	8.93881	10.9364								275	1.22401
11	10	28.5446	6.71451	0.166978	295.582	-18.4221	12.8385								276	1.21501
11	11	28.6005	6.86127	0.717846	206.699	-88.8831	15.0827								277	1.37701
11	12	28.7858	6.89682	0.145574	222.775	16.0767	17.4024								278	1.18801
11	13	28.7609	7.16634	0.046782	156.637	-66.1385	18.927								279	1.25101
11	14	26.6766	7.82886	0.503534	27.4142	-129.223	20.2579								280	1.29601
11	15	28.4652	7.19341	0.857749	192.416	165.002	21.9853								281	1.22401
11	16	28.632	7.11069	1.77468	240.643	48.2264	23.999								282	1.05301
11	17	28.0176	7.13335	1.50522	265.842	25.199	26.5555								283	0.918009
11	18	25.9521	7.7467	1.37648	298.006	32.1641	28.4478								284	0.945009
11	19	26.0219	11.751	0.704439	4.5009	66.495	28.2069								285	1.12501
11	20	27.6901	11.6371	0.139313	7.57425	3.07335	28.6844								286	0.810008
11	21	27.8912	11.3926	0.219669	303.899	-63.6748	29.3765								287	0.882009
11	22	28.1287	11.5852	0.0850048	283.606	-20.2936	29.968								288	0.828008
11	23	28.1044	11.582	0.193749	292.339	8.73285	30.118								289	0.891009
11	24	28.2587	11.9396	0.0711004	253.102	-39.2364	29.5383								290	0.891009
11	25	28.1887	11.833	0.0834677	318.886	65.784	28.9408								291	0.756008
11	26	28.3253	12.1197	0.0592131	58.7208	99.8345	27.9175								292	0.837008
11	27	28.1967	12.1437	0.0693709	56.091	-2.62976	27.3302								293	0.828008
11	28	28.3774	11.9977				27.3037								294	0.621006
11	29	28.4176	11.9678				27.3282								295	0.648006
11	30	28.3128	11.9709												296	0.684007
12	1	50.2352	7.40207	0.148592	49.3675		3.29725								297	0.621006
12	2	50.505	7.17488	0.102606	75.1042	25.7367	3.92488								298	0.657007
12	3	50.5919	7.10915	0.170278	75.8573	0.753094	5.01687								299	0.558006
12	4	50.5255	7.06377	0.247468	89.0852	13.2279	4.1248								300	0.603006
12	5	50.5841	6.87741	0.155002	87.7066	-1.3786	5.04152								301	0.594006
12	6	50.7167	6.6138	0.199767	104.986	17.2797	5.26742								302	0.594006
12	7	50.5374	6.32146	0.155386	173.836	68.8497	6.34322								303	0.504005
12	8	50.6027	6.41278	0.439299	94.5285	-79.3075	6.94463								304	0.603006
12	9	50.5618	6.03489	0.132668	89.4118	-5.1167	7.58019								305	0.405004
12	10	50.0739	6.27141	0.18969	39.0842	-50.3276	9.00777								306	0.405004
12	11	50.4987	5.099	2.38207	271.933	-127.151	10.3925								307	0.486005
12	12	50.5659	5.6369				14.0095								308	0.387004
12	13	50.5156	5.91263				23.671								309	0.450005
12	14	50.7398	12.2411												310	0.342003
13	1	6.3693	7.73026	0.278787	42.6757		2.92975								311	0.351004
13	2	6.43195	7.33114	0.234787	19.7177	-22.958	6.33326								312	0.288003
13	3	6.43144	7.21431	0.298883	350.259	-29.459	9.98045								313	0.423004
13	4	6.9842	7.16333	0.196199	311.457	-38.8019	14.4875								314	0.333003
13	5	7.09502	7.0935	0.249607	271.169	-40.288	18.6412								315	0.315003
13	6	7.31516	7.36602	0.223774	263.381	-7.7882	21.0355								316	0.369004
13	7	7.37388	7.60446	0.144636	243.088	-20.2925	22.5949								317	0.333003
13	8	7.11029	7.84216	0.0392815	251.367	8.27941	24.2695								318	0.333003
13	9	7.23777	8.03287	0.052095	170.742	-80.6258	25.6166								319	0.333003
13	10	7.17749	7.99137	0.0414343	276.708	105.966	26.3843								320	0.261003
13	11	7.07264	7.95383	0.602812	201.779	-74.9291	27.9022								321	0.297003
13	12	7.08352	8.00773	0.316279	338.585	136.807	29.2397								322	0.288003
13	13	7.19201	8.11483	0.37252	335.046	-3.53953	30.899								323	0.297003
13	14	5.39328	8.6248	0.614304	155.13	-179.916	30.155								324	0.243002
13	15	7.96685	8.35416	0.691981	195.47	40.3402	33.1397								325	0.252003
13	16	8.20524	8.58632	0.939501	181.565	-13.9055	35.9317								326	0.288003
13	17	3.72127	7.84974	1.12311	352.16	170.595	37.9586								327	0.315003
13	18	5.96612	8.90789	0.342037	51.8621	59.7021	41.3153								328	0.315003
13	19	5.38778	8.66328	0.543779	10.9866	-40.8754	45.3843								329	0.252003
13	20	7.0591	8.30934	0.106096	254.402	-116.584	50.8027								330	0.351004
13	21	6.5998	8.10083	0.277136	301.686	47.2842	58.2365								331	0.243002
13	22	6.98922	8.35238	0.683462	334.748	33.062	68.0363								332	0.207002
13	23	6.97352	8.61591	2.06076	302.939	-31.8092	79.9987								333	0.288003
13	24	7.03652	8.8083	3.18478	289.09	-13.8492	95.0768								334	0.207002
13	25	8.84368	9.22706	2.93821	280.279	-8.81111	112.93								335	0.243002
13	26	10.3351	13.8044	1.39121	273.946	-6.33304	126.07								336	0.270003
13	27	10.1613	17.8372	0.114143	354.906	80.9604	126.859								337	0.162002
13	28	10.4166	17.9002				125.244								338	0.207002
13	29	10.6223	17.9681				119.848								339	0.198002
13	30	10.5024	17.8676												340	0.216002
14	1	28.8464	10.0544	0.301058	188.573		1.36805								341	0.261003
14	2	27.9631	10.123	0.0463914	298.093	109.52	2.5949								342	0.189002
14	3	28.0602	10.118	0.111797	261.704	-36.3896	3.38327								343	0.225002
14	4	27.9533	10.1891	0.0772508	270.19	8.48602	3.85548								344	0.243002
14	5	28.0287	10.2458	0.0797787	235.021	-35.169	4.79148								345	0.099001
14	6	28.0118	10.4499	0.143196	207.222	-27.7988	6.28144								346	0.207002
14	7	27.954	10.4208	0.180104	225.117	17.8951	7.67898								347	0.252003
14	8	27.8915	10.4419	0.112503	218.261	-6.85594	8.99859								348	0.198002
14	9	27.6298	10.6464	0.111161	296.418	78.1575	10.4945								349	0.135001
14	10	27.5728	10.8037	0.327338	284.426	-11.9922	12.2859								350	0.207002
14	11	27.6265	10.6509	0.80484	207.717	-76.7093	14.5286								351	0.171002
14	12	27.7781	10.945	0.20105	253.529	45.8121	16.2842								352	0.126001
14	13	27.8174	11.7547	0.0591849	107.572	-145.957	17.7126								353	0.216002
14	14	25.489	11.7739	0.768608	6.0371	-101.535	18.7697								354	0.216002
14	15	27.6071	11.5234	0.750911	186.947	-179.09	20.8105								355	0.243002
14	16	27.7638	11.5854	1.64124	238.634	51.6871	23.3514								356	0.234002
14	17	27.782	11.5314	1.44686	263.469	24.835	25.8584								357	0.171002
14	18	25.3709	11.7959	1.50149	300.172	36.7037	28.4805								358	0.234002
14	19	25.201	15.7896	0.811991	358.521	58.3485	27.9005								359	0.234002
14	20	27.2883	15.8438	0.118163	346.982	-11.539	27.9214
14	21	27.6349	15.6901	0.114201	280.137	-66.8453	28.3275
14	22	27.6361	15.8525	0.051762	289.845	9.70871	28.3743
14	23	27.6337	15.9236	0.253057	112.286	-177.56	28.0528
14	24	27.6952	16.0273	0.229366	111.492	-0.793289	27.3875
14	25	27.6889	15.9985	0.25966	117.333	5.84068	26.6688
14	26	27.3458	15.2212	0.0391812	348.103	-129.23	27.0165
14	27	27.4431	15.3871	0.290817	22.5409	34.4374	26.9194
14	28	27.3312	15.3065				26.6244
14	29	27.4608	15.2454				25.3389
14	30	28.2489	15.0526
15	1	19.3123	11.1628	1.7213	322.651		3.51067
15	2	23.0734	10.1763	1.39152	283.584	-39.0667	6.07066
15	3	23.3606	14.1406	0.0862746	296.873	13.2885	7.88202
15	4	23.4174	14.2956	1.10782	255.775	-41.0981	9.62915
15	5	24.0539	14.2341	1.86235	213.347	-42.4278	12.3931
15	6	23.4776	14.3715	1.69181	215.749	2.40239	15.9071
15	7	22.6007	17.5172	0.875009	182.154	-33.595	17.4825
15	8	19.3867	17.3053	0.220009	324.058	141.904	19.3542
15	9	19.3585	17.3367	0.241417	315.123	-8.93537	20.565
15	10	19.9775	17.6159	0.136903	254.72	-60.4027	22.6655
15	11	19.921	17.6927	0.927361	187.878	-66.8422	26.0193
15	12	19.8717	17.8478	0.0840139	279.982	92.1045	30.2443
15	13	19.8693	18.012	0.0709875	329.688	49.706	31.6123
15	14	17.1652	18.074	0.714316	356.425	26.7369	34.1739
15	15	19.9154	18.096	0.448693	215.764	-140.662	37.5046
15	16	20.0532	18.1195	0.442099	214.41	-1.35396	42.2071
15	17	19.304	18.2076	0.562058	347.099	132.69	44.3493
15	18	18.8231	18.8827	0.797507	18.794	31.6948	43.9065
15	19	18.9589	18.869	0.743764	20.5923	1.7983	48.5224
15	20	20.9476	18.5841				59.0412
15	21	21.0881	18.1119				50.9172
15	22	21.0477	18.0842
16	1	23.0853	10.7517	1.79932	318.217		8.53765
16	2	23.4788	14.1902	1.41108	353.312	35.0948	22.6669
16	3	26.8684	14.3498	0.308411	342.368	-10.9437	38.604
16	4	27.1104	14.3484	0.0375071	26.5229	44.1548	56.538
16	5	27.6833	14.6833	0.0617619	17.1626	-9.36029	78.0861
16	6	27.7502	14.63	0.0969923	260.085	-117.078	104.709
16	7	27.211	14.2982	0.26342	298.415	38.33	124.77
16	8	27.8603	14.6286	0.20367	186.571	-111.844	145.985
16	9	27.7001	14.9166	0.424099	174.182	-12.3887	169.598
16	10	27.5871	14.9932	2.0857	266.53	92.3477	192.049
16	11	27.2533	14.6985	1.8747	290.647	24.1168	215.641
16	12	26.4344	14.7877	2.17672	315.043	24.3967	238.503
16	13	27.2084	21.2389	1.51234	27.0185	71.975	259.109
16	14	29.2364	19.9614	0.579975	4.9114	-22.1071	287.594
16	15	31.0554	19.4017	2.94543	334.68	-30.2316	322.509
16	16	31.2502	19.1778	4.64961	335.437	0.757209	376.78
16	17	30.9699	19.8124	5.37388	341.475	6.03831	453.764
16	18	39.0428	23.1808	2.32443	342.843	1.368	519.974
16	19	43.9367	24.9762	0.484171	4.44216	21.5989	561.36
16	20	46.2563	24.9345	0.347671	174.693	170.25	587.344
16	21	45.7058	25.2378				641.189
16	22	45.3849	24.8637				688.27
16	23	45.2177	24.838
17	1	0.745115	11.9955	0.13207	137.698		0.123246
17	2	0.474707	11.922	0.0974326	98.0352	-39.6631	0.239704
17	3	0.504317	11.8262	0.047761	89.9388	-8.09642	0.31983
17	4	0.452074	11.7288	0.184377	278.113	-171.826	0.404778
17	5	0.433849	11.6326	0.388041	275.98	-2.13309	0.495107
17	6	0.50447	11.6829	0.435194	280.026	4.04602	0.623003
17	7	0.530138	12.2764	0.266043	292.613	12.5865	0.73999
17	8	0.555133	12.7903	0.151485	310.481	17.868	0.834166
17	9	0.73177	12.9686	0.0906458	284.532	-25.9482	0.918487
17	10	0.837018	13.0132	0.0920424	302.802	18.2691	0.931836
17	11	0.850162	13.136	0.229943	209.857	-92.9449	0.943589
17	12	0.800007	13.2318	0.0467713	28.2114	178.355	0.963417
17	13	0.986605	13.2453	0.102609	16.5554	-11.656	0.977999
17	14	0.251892	13.4794	0.245525	19.7567	3.2013	0.931249
17	15	0.923653	13.1655	0.245601	154.627	134.87	0.89084
17	16	1.28167	13.1576	0.373386	187.218	32.5917	0.874033
17	17	0.945109	13.2305	0.149768	157.587	-29.6317	0.940093
17	18	0.257927	12.8497	0.0815712	323.954	166.367	1.07521
17	19	0.170391	13.2983	0.110089	56.527	92.5734	1.17813
17	20	0.529748	13.0591	0.0583364	104.364	47.8371	1.40639
17	21	0.455788	12.9937	0.0517862	248.375	144.011	1.69912
17	22	0.352547	13.0228	0.092738	260.756	12.3809	2.00387
17	23	0.486331	12.8896	0.163302	265.802	5.04632	2.41009
17	24	0.398534	13.1382	0.163529	276.625	10.8223	2.71628
17	25	0.307855	13.2974	0.0685362	313.869	37.2446	2.69311
17	26	0.450471	13.3782	0.020283	171.617	-142.252	2.5921
17	27	0.45513	13.6255	0.0766635	122.182	-49.4347	2.2987
17	28	0.450345	13.4457				2.15504
17	29	0.390272	13.3693				2.2303
17	30	0.332633	13.4308
18	1	11.224	12.3793	0.266523	146.375		4.30186
18	2	10.4698	12.1797	1.44733	278.316	131.94	7.77289
18	3	10.4582	12.0865	1.4998	276.157	-2.15852	11.8463
18	4	10.5583	11.9366	1.55481	273.309	-2.84793	17.492
18	5	11.0977	16.476	0.164974	214.606	-58.7029	23.0935
18	6	10.9408	16.56	0.0334166	214.773	0.166565	27.5832
18	7	10.8275	16.5932	0.0442518	311.062	96.2887	31.8911
18	8	10.6904	16.7571	0.123512	22.8008	71.7392	36.9905
18	9	10.8585	16.6171	0.0858765	319.327	-63.4741	42.5604
18	10	10.9147	16.6933	0.0416595	288.361	-30.9659	51.0683
18	11	11.032	16.6135	0.759739	192.354	-96.0065	56.8611
18	12	11.0539	16.7851	0.174505	230.191	37.8372	63.0898
18	13	10.9541	16.8119	0.127073	254.72	24.5288	72.7615
18	14	8.80552	17.1011	0.615772	342.409	87.6885	81.4329
18	15	10.7187	17.1872	1.54484	300.281	-42.1279	90.3282
18	16	10.8536	17.1797	1.54821	298.346	-1.93517	100.435
18	17	10.5665	17.6594	1.95671	316.845	18.4997	113.964
18	18	13.0556	21.1894	0.756493	246.018	-70.8276	123.087
18	19	13.0588	21.2674	0.763443	245.693	-0.324877	133.55
18	20	14.8488	21.6744	1.01998	212.933	-32.7602	144.56
18	21	12.1332	23.263	0.133495	266.398	53.465	156.718
18	22	12.1161	23.3547	0.259621	325.375	58.9774	173.228
18	23	12.2806	23.338	1.78844	212.1	-113.275	199.008
18	24	12.108	23.6627	2.26599	231.378	19.278	231.044
18	25	12.757	23.7973	2.30243	229.304	-2.07378	275.803
18	26	7.73547	26.1891	0.921693	281.96	52.6558	333.043
18	27	7.86481	28.9738	1.50728	247.132	-34.8281	344.148
18	28	8.25312	29.0342				369.807
18	29	8.30846	28.8941				457.193
18	30	6.10756	33.1402
19	1	35.2145	12.2367	2.6397	326.46		6.68643
19	2	35.0248	12.2101	2.80511	325.67	-0.790197	14.8022
19	3	42.0123	16.5558	0.175625	314.199	-11.4708	21.3325
19	4	41.8151	16.6121	0.253961	301.851	-12.3484	29.2242
19	5	41.9742	16.956	1.52021	254.297	-47.5535	39.6099
19	6	42.3796	16.9336	1.56224	249.172	-5.12569	52.3551
19	7	42.2171	17.2593	1.61722	249.723	0.550896	64.9701
19	8	40.7399	21.3464	0.272462	226.602	-23.1206	71.7876
19	9	40.7132	21.314	0.262162	224.018	-2.58401	78.6896
19	10	40.5357	21.8102	0.0830305	280.263	56.245	86.5324
19	11	40.1783	21.9403	1.15649	320.052	39.7894	97.6555
19	12	40.1476	21.8605	1.95983	334.902	14.8497	117.968
19	13	40.5801	22.0553	1.94632	335.999	1.09735	147.448
19	14	42.8381	24.168	1.00165	355.957	19.957	172.377
19	15	45.472	24.3544	1.64386	343.113	-12.8435	196.003
19	16	45.9142	24.4303	1.47323	341.298	-1.81522	245.18
19	17	45.8356	24.3799	1.73301	353.387	12.0896	324.293
19	18	50.1909	25.787				412.545
19	19	50.1006	25.8475				411.538
19	20	51	24.9786
20	1	48.3645	12.0996	0.111165	127.126		4.39306
20	2	48.2025	11.9346	0.0720164	19.3581	-107.768	7.26167
20	3	47.9558	11.4457	0.211822	307.538	-71.8203	10.7527
20	4	48.1632	11.8337	0.100527	308.723	1.18514	12.4361
20	5	48.4063	11.8629	0.101994	264.467	-44.256	13.8124
20	6	48.343	11.9496	0.0769536	339.098	74.6309	14.586
20	7	48.3519	12.069	0.184221	47.3095	68.2117	15.9087
20	8	48.3768	12.1675	0.129214	55.9747	8.66517	18.2393
20	9	48.5586	12.0319	0.112452	61.4344	5.4597	22.1025
20	10	48.7266	11.6627	0.0721821	223.081	161.647	27.8032
20	11	48.5937	11.8462	0.827987	192.261	-30.82	30.79
20	12	48.7199	11.7356	0.122037	197.339	5.07718	31.8636
20	13	48.5685	11.8106	0.121394	229.434	32.0956	32.6667
20	14	46.1664	12.3737	0.622055	6.01619	136.582	33.1426
20	15	48.3705	11.8448	0.583755	347.146	-18.8703	35.8968
20	16	48.3316	12.0873	0.574156	355.368	8.22238	38.3863
20	17	48.0223	12.1782	1.14269	303.849	-51.5191	44.0654
20	18	50.0778	12.2344	1.21224	257.682	-46.1671	47.6564
20	19	50.0485	12.2264	1.27745	258.262	0.579511	51.3671
20	20	49.9318	15.0252	0.441212	265.486	7.22461	54.6644
20	21	49.302	15.7873	0.262438	346.764	81.2778	57.6738
20	22	49.2688	15.9786	0.356159	339.241	-7.52263	62.7062
20	23	49.8276	16.3447	0.215875	306.873	-32.368	69.5181
20	24	50.0684	15.9676	0.159079	278.865	-28.0086	78.0616
20	25	50.2679	16.3573	2.33849	201.061	-77.8038	88.8416
20	26	50.2162	16.8628	3.23346	237.64	36.5788	104.561
20	27	50.142	16.4391	3.08787	217.689	-19.9504	129.948
20	28	43.7211	18.8784				155.751
20	29	45.0242	25.0567				130.902
20	30	42.8113	22.1027
21	1	11.3012	16.8314	0.145568	123.99		10.6044
21	2	10.9979	16.8905	1.74819	291.769	167.779	25.8954
21	3	10.9903	16.7236	1.82598	290.515	-1.25392	45.8857
21	4	11.0571	16.4693	3.24399	246.047	-44.4682	74.4562
21	5	12.9429	21.7611	2.18646	212.105	-33.9414	106.111
21	6	12.9101	21.8542	3.05357	233.491	21.386	142.481
21	7	7.10596	25.3631	1.26497	274.16	40.6689	183.646
21	8	7.38663	25.2472	1.31899	269.008	-5.15214	230.26
21	9	7.4599	29.2172	2.73705	286.745	17.7369	278.231
21	10	7.38125	29.148	2.76165	287.225	0.480242	334.483
21	11	7.31811	29.2036	3.12615	306.215	18.9904	395.259
21	12	9.82559	37.0802	2.1551	325.981	19.7658	441.978
21	13	9.83461	37.0614	2.3806	327.435	1.45347	496.627
21	14	12.8591	36.7702	1.67396	302.633	-24.8016	566.601
21	15	15.1844	40.6973	1.77606	332.318	29.685	637.047
21	16	15.8536	40.9056	1.53669	332.953	0.634983	723.646
21	17	15.5672	40.9993	2.0475	285.774	-47.1785	818.731
21	18	19.9027	43.1726	3.62537	244.815	-40.9598	917.875
21	19	19.9594	43.0019	5.15133	232.778	-12.0363	1036.43
21	20	17.237	46.9105	3.55919	232.851	0.0724036	1124.92
21	21	15.2744	53.0148	1.74101	205.348	-27.5033	1190.73
21	22	10.6113	55.3079	0.161709	211.637	6.28952	1253.87
21	23	10.7889	55.4212	0.212796	176.187	-35.4505	1302.13
21	24	10.5542	55.2508	0.168952	188.67	12.4839	1369.2
21	25	10.1983	55.5624	0.21165	127.382	-61.2885	1413.19
21	26	10.1519	55.3787	0.151248	152.221	24.8388	1481.18
21	27	10.0531	55.3272	0.134994	164.816	12.5953	1471.32
21	28	9.8128	55.0578				1471.53
21	29	9.75048	55.1673				1476.46
21	30	9.66229	55.2212
22	1	20.1377	17.314	2.66249	211.151		8.73212
22	2	15.785	20.6587	1.94325	292.091	80.9395	21.3632
22	3	13.1146	21.6235	3.96923	301.491	9.39982	33.0747
22	4	13.302	21.446	5.03914	288.782	-12.7087	45.0727
22	5	17.9775	26.0604	3.46357	253.38	-35.4018	58.7924
22	6	19.3347	31.7775	1.95294	223.016	-30.3646	70.458
22	7	18.1693	35.7584	0.993029	183.962	-39.0537	78.8797
22	8	15.0055	36.0171	0.0542127	48.6007	-135.361	86.0991
22	9	15.0509	35.7744	0.167124	258.48	-150.121	94.8215
22	10	15.1974	35.9642	0.182648	250.987	-7.49268	107.528
22	11	15.1131	35.8951	0.43102	355.143	104.156	117.572
22	12	14.9508	36.2656	0.0632163	184.795	-170.348	125.471
22	13	15.0189	36.4823	0.0470302	120.247	-64.5485	133.96
22	14	16.4015	36.0046	0.560427	186.713	66.4667	146.312
22	15	14.7618	36.2815	0.704766	193.649	6.93559	165.054
22	16	14.9478	36.3604	0.735149	185.439	-8.21007	197.161
22	17	14.7317	36.2011	1.76711	284.967	99.5277	233.574
22	18	12.7072	36.7804	2.86246	274.55	-10.4164	274.172
22	19	12.7523	36.5695	3.10812	276.371	1.82104	324.995
22	20	16.1009	41.3226	1.66601	240.66	-35.7114	373.111
22	21	13.3885	45.3407	0.167119	302.344	61.684	404.879
22	22	13.787	45.8362	0.0165363	280.082	-22.2623	440.393
22	23	13.6519	45.6795	0.119368	2.93451	82.853	492.848
22	24	13.6567	45.7643	0.264613	57.0934	54.1589	557.622
22	25	13.7957	45.8851	0.354208	68.9292	11.8359	621.985
22	26	14.0095	45.6612	0.20229	93.588	24.6588	666.827
22	27	14.088	45.0978	2.18546	203.866	110.278	700.828
22	28	14.1777	44.8935				800.378
22	29	13.9715	45.0555				1071.47
22	30	8.09218	47.7505
23	1	41.9142	16.5487	1.54665	249.772		10.9755
23	2	41.9681	16.609	1.55794	254.312	4.53973	24.3409
23	3	40.6069	20.1325	0.361987	284.66	30.3478	28.1563
23	4	40.31	20.9025	0.230218	320.223	35.5632	39.0289
23	5	40.7043	21.1087	1.68704	335.278	15.0555	51.3986
23	6	40.8817	21.1831	1.55742	331.576	-3.70272	63.5175
23	7	40.8408	21.3444	1.68097	322.581	-8.99431	80.502
23	8	45.3015	23.2253	1.40292	278.6	-43.9814	105.034
23	9	44.9907	23.4071	1.34856	281.504	2.90393	132.497
23	10	44.8459	24.4086	1.07413	290.458	8.95364	160.386
23	11	45.9309	27.3868	0.967576	306.405	15.9474	184.411
23	12	45.7976	27.3715	1.52011	333.012	26.6072	210.472
23	13	45.9722	27.4278	1.62519	338.18	5.16763	242.371
23	14	47.6536	29.723	0.96658	3.73707	25.5571	277.584
23	15	49.8613	29.441	0.534892	202.401	-161.336	308.588
23	16	50.4985	29.24	1.76787	266.423	64.022	348.676
23	17	50.5472	29.534	3.49187	270.774	4.3507	403.423
23	18	48.3777	30.0525	3.31111	283.16	12.3863	462.205
23	19	50.1676	34.5333	1.87882	275.493	-7.66752	508.459
23	20	50.6887	40.0087	0.0314621	310.162	34.6698	530.291
23	21	50.6393	39.725	0.267269	276.107	-34.0557	546.994
23	22	50.7071	40.1438	1.82643	91.301	175.194	563.237
23	23	50.7495	40.0808	1.41034	208.112	116.811	579.864
23	24	50.7246	40.5222	3.83725	221.344	13.2318	621.07
23	25	50.5827	34.666				835.49
23	26	47.0177	42.0744				997.192
23	27	42.0821	48.1266
24	1	23.4185	17.7125	1.08801	171.838		11.3013
24	2	20.1727	17.2955	0.239509	358.088	-173.75	25.567
24	3	20.2814	17.3242	2.74808	324.422	-33.6661	48.5058
24	4	20.1876	17.2492	2.64266	316.434	-7.9881	76.6416
24	5	20.8908	17.3194	5.45768	313.341	-3.0927	108.844
24	6	26.9866	22.1207	2.75598	309.558	-3.78365	146.204
24	7	25.9321	22.713	2.84635	315.045	5.48713	186.535
24	8	32.1284	29.2272	2.15942	252.385	-62.6604	224.337
24	9	32.2521	28.4952	4.3535	247.737	-4.64756	264.735
24	10	31.9748	28.7463	4.26697	249.154	1.41693	309.486
24	11	30.1679	35.4017	2.48095	230.147	-19.0067	357.257
24	12	27.3041	40.5821	0.0814643	218.066	-12.0813	401.18
24	13	27.4195	40.7093	0.184617	237.841	19.7753	456.456
24	14	25.3984	41.1155	0.500556	352.506	114.665	510.89
24	15	27.1116	40.7328	1.78688	313.145	-39.3603	580.768
24	16	27.1247	41.1781	1.68392	317.251	4.10521	659.564
24	17	26.8872	41.3113	2.32057	335.584	18.3336	755.43
24	18	30.7775	44.644	1.19251	293.658	-41.9266	852.199
24	19	30.8344	44.6072	2.69362	301.129	7.47187	970.283
24	20	33.2264	44.189	2.43949	282.273	-18.8559	1101.38
24	21	32.2131	47.9209	2.61779	318.768	36.495	1209.38
24	22	35.012	51.5245	1.12801	332.471	13.7024	1308.63
24	23	34.7821	51.3402	1.2693	332.974	0.503472	1441.68
24	24	38.1192	53.0971	0.0295916	346.714	13.74	1504.97
24	25	38.0128	53.0886	0.10765	3.63481	16.9205	1593.69
24	26	38.1742	53.0705	0.270507	0.434989	-3.19982	1598.15
24	27	38.2056	53.1175	0.351421	329.164	-31.2713	1593.52
24	28	38.3351	53.0681				1586.48
24	29	38.9857	53.0643				1538.32
24	30	39.1109	53.6579
25	1	15.849	20.9938	3.22616	206.581		8.51029
25	2	13.2071	21.8184	2.34905	209.444	2.86249	17.5903
25	3	7.32346	25.5373	0.10767	137.874	-71.5703	28.6997
25	4	7.19348	25.3247	1.33654	269.188	131.314	41.0011
25	5	7.07021	25.2826	1.27025	272.152	2.96452	58.1185
25	6	7.0839	25.3206	2.25951	248.389	-23.7627	78.2612
25	7	7.13663	29.3339	1.16433	222.051	-26.3385	102.153
25	8	7.21331	29.0906	1.10999	220.38	-1.67053	131.273
25	9	4.58739	31.6227	0.942341	225.853	5.47229	160.62
25	10	4.54289	31.6735	1.00767	227.538	1.68544	192.594
25	11	4.67668	31.248	1.58176	215.228	-12.3101	232.993
25	12	2.61835	33.6512	0.223664	242.76	27.5321	263.31
25	13	2.50207	33.9036	1.43108	265.732	22.9719	296.784
25	14	0.800448	33.9852	1.48579	289.207	23.4748	337.141
25	15	2.31122	34.2478	1.58593	246.584	-42.6225	387.581
25	16	2.18256	38.1849	0.387092	181.572	-65.0127	430.286
25	17	2.26684	38.1945	2.43742	265.239	83.6668	479.111
25	18	0.420486	38.6138	2.34132	285.932	20.6938	534.042
25	19	1.02172	38.2168	4.73969	288.902	2.96932	603.31
25	20	1.65987	45.4815	2.44239	303.155	14.2535	646.411
25	21	2.34859	45.3679	2.25303	298.501	-4.65467	703.814
25	22	5.62793	51.6691	0.10999	142.234	-156.266	745.328
25	23	5.66717	51.6157	0.105978	141.611	-0.623019	779.414
25	24	5.57381	51.3079	0.114261	239.458	97.8464	835.174
25	25	5.36708	51.467	0.0132824	159.179	-80.2793	864.994
25	26	5.41797	51.4183	0.188513	271.768	112.59	910.211
25	27	5.39962	51.6031	1.64057	240.335	-31.4335	982.804
25	28	5.32984	51.4529				1166.95
25	29	5.43542	51.9835				1383.06
25	30	2.9637	55.8798
26	1	39.108	20.6839	3.94654	264.129		16.9754
26	2	39.3407	20.7141	5.81972	271.772	7.64315	41.4664
26	3	37.4291	27.0227	3.22078	279.023	7.25051	62.4265
26	4	37.897	32.4614	0.109827	90.1883	171.166	84.5875
26	5	39.8807	38.1649	1.45755	150.792	60.6032	107.469
26	6	38.9444	36.5655	2.35433	254.029	103.237	137.146
26	7	37.8959	32.1319	3.69331	264.933	10.9038	186.168
26	8	36.064	36.0311	4.7977	265.484	0.551516	242.87
26	9	37.001	43.3559	3.19092	276.778	11.2939	307.838
26	10	36.9173	43.1686	3.2568	297.487	20.7083	375.15
26	11	34.9308	50.3795	1.48515	338.126	40.6398	426.393
26	12	38.1309	52.8617	0.153974	270.439	-67.6876	481.486
26	13	41.4267	51.8361	1.27769	207.824	-62.6149	554.285
26	14	39.0655	52.0394	2.90325	258.033	50.2094	648.653
26	15	38.1344	53.3236	2.78107	250.541	-7.49268	741.363
26	16	38.0368	53.6252	2.60573	255.574	5.03324	846.975
26	17	37.2596	60.5599	0.159749	302.154	46.5804	925.025
26	18	35.3549	61.1902	0.634854	14.7287	72.5745	1018.17
26	19	36.0893	61.1959	2.06186	233.936	-140.792	1148.46
26	20	37.5147	60.9656	2.34067	225.377	-8.55955	1307.64
26	21	37.1969	60.706	2.36551	225.82	0.443477	1456.4
26	22	32.4479	66.1961	0.178564	67.6849	-158.135	1598.14
26	23	32.5821	65.9635	1.19704	272.089	-155.596	1708.74
26	24	32.2513	65.7954	1.27869	277.728	5.63918	1795.07
26	25	32.6513	65.7005	1.30141	272.094	-5.63474	2004.51
26	26	32.713	69.5522	1.82231	322.836	50.7425	2287.68
26	27	32.7671	69.5966	3.41348	290.713	-32.1234	2625.88
26	28	32.794	69.6022				3076.18
26	29	37.0697	72.8548				3428.61
26	30	36.389	79.1751
27	1	13.3926	21.7987	3.58404	300.124		11.6911
27	2	11.642	28.0451	2.73012	331.119	30.9952	25.4772
27	3	18.8093	31.0192	1.54932	260.113	-71.0057	41.3648
27	4	18.7887	31.0987	2.08906	231.874	-28.2386	60.6785
27	5	18.8136	32.001	3.12477	244.79	12.9158	82.9738
27	6	18.0112	35.5982	1.88982	237.654	-7.13592	109.887
27	7	14.9194	36.0289	1.53606	279.636	41.9812	144.853
27	8	14.8208	40.4824	0.359658	358.41	78.7747	176.673
27	9	14.9779	40.3879	0.332233	341.07	-17.3404	212.61
27	10	15.6907	40.572	0.0999891	207.218	-133.852	252.011
27	11	15.8994	40.5124	0.719641	193.234	-13.9838	290.16
27	12	15.9207	40.7113	1.76698	235.807	42.5732	324.585
27	13	15.424	40.7092	1.64508	243.298	7.49094	365.272
27	14	13.7978	41.0066	1.45677	262.033	18.7352	416.965
27	15	12.9416	45.0959	0.532873	190.407	-71.6259	472.18
27	16	13.2063	45.1181	0.519856	188.783	-1.62374	536.229
27	17	13.192	45.3347	2.03808	214.558	25.7747	600.176
27	18	11.3693	45.3847	2.87626	224.031	9.47278	669.317
27	19	11.665	45.3563	4.3912	227.556	3.52526	757.452
27	20	8.15665	48.803	2.74578	229.668	2.11199	847.319
27	21	5.16551	51.3821	3.30248	267.055	37.3871	944.799
27	22	2.77461	55.0776	2.21389	287.805	20.7498	1045.24
27	23	2.82533	55.0824	2.2969	285.698	-2.10662	1185.98
27	24	4.65653	61.2765	0.206332	248.15	-37.5486	1260.93
27	25	4.80549	61.4011	0.221268	235.292	-12.8574	1353.2
27	26	4.68976	61.716	1.71747	274.868	39.5753	1423.59
27	27	4.42615	61.851	2.9479	324.683	49.8152	1527.95
27	28	4.42752	61.9468				1806.29
27	29	5.12697	66.8499				2042.93
27	30	11.6423	66.9636
28	1	44.1347	23.2017	2.53424	312.188		9.14544
28	2	44.1842	23.134	2.64398	309.261	-2.92738	19.0742
28	3	45.2495	27.3672	1.53503	334.32	25.0592	26.6545
28	4	49.2405	28.8348	0.197616	282.859	-51.4617	38.1927
28	5	49.204	29.2755	0.0971282	265.185	-17.6738	50.6705
28	6	49.3997	29.3628	0.101001	194.547	-70.638	56.1384
28	7	49.3724	29.4128	0.0488882	178.324	-16.2225	63.8035
28	8	49.1795	29.5658	1.61222	289.132	110.808	77.7952
28	9	49.1064	29.4389	1.68052	289.135	0.0024843	103.707
28	10	49.2258	29.4085	1.68016	285.154	-3.98084	140.786
28	11	50.7647	34.1353	2.65052	256.463	-28.6909	173.006
28	12	50.759	34.2019	2.1065	270.48	14.0173	246.93
28	13	50.5435	34.2737				358.669
28	14	48.9035	41.866				344.549
28	15	50.8119	40.5212
29	1	7.87757	25.1502	1.38712	260.269		12.3127
29	2	7.71606	25.2827	1.31996	261.337	1.06805	24.6616
29	3	7.72003	29.8629	0.240691	131.204	-130.133	41.1061
29	4	7.17423	29.2517	2.14305	227.673	96.4682	63.2991
29	5	7.11963	29.1974	2.17654	228.429	0.755907	87.2764
29	6	7.24436	29.3196	3.47877	240.534	12.1056	127.416
29	7	2.84505	34.0049	1.44621	265.682	25.148	165.126
29	8	2.78689	34.0824	1.45929	258.984	-6.69836	210.565
29	9	2.1107	38.406	2.63425	271.138	12.1542	258.43
29	10	2.5184	38.3312	2.55363	269.52	-1.61766	302.244
29	11	1.95033	38.3796	2.62129	258.528	-10.9919	362.2
29	12	2.26765	46.3072	0.364908	105.551	-152.977	417.409
29	13	2.45427	45.9918	0.274557	116.8	11.2491	487.984
29	14	0.386356	46.0864	2.33814	308.448	-168.352	577.08
29	15	1.97416	45.2525	2.21389	276.096	-32.3521	657.13
29	16	2.0829	45.2566	2.19888	275.553	-0.542798	764.669
29	17	4.74797	51.5799	1.45611	241.53	-34.0235	866.264
29	18	2.67947	51.8567	1.07213	270.758	29.2279	971.315
29	19	2.72125	51.8223	3.04691	280.711	9.95313	1109.27
29	20	2.66556	55.42	1.97001	288.552	7.84111	1198.99
29	21	2.72199	55.0727	3.73496	258.458	-30.094	1337.4
29	22	4.42005	60.8038	2.23087	235.566	-22.8921	1463.98
29	23	4.54591	61.0229				1731.04
29	24	0.480014	66.0511				1747.7
29	25	0.635648	66.3237
30	1	50.4826	24.6627	0.0936649	326.251		0.137319
30	2	50.5048	24.7473	0.117969	329.364	3.11242	0.129786
30	3	50.7319	24.6787	0.126445	292.059	-37.3046	0.182786
30	4	50.7163	24.8189	0.156084	282.752	-9.30737	0.185276
30	5	50.8093	24.9277	0.0896415	262.967	-19.7851	0.178419
30	6	50.8744	25.0302	0.0335236	217.809	-45.1577	0.185802
30	7	50.8196	25.2756	0.0252853	147.727	-70.0823	0.16072
30	8	50.7764	25.1946	0.181809	95.6647	-52.062	0.195873
30	9	50.795	25.0919	0.0785374	234.681	139.016	0.264667
30	10	50.7555	25.2351	0.055439	88.3741	-146.307	0.266784
30	11	50.7225	24.6518	0.378925	259.008	170.634	0.405667
30	12	50.6587	25.2841	0.0602611	13.2592	114.251	0.407892
30	13	50.7602	25.0688	0.0409148	116.534	103.274	0.551663
30	14	50.5058	25.7677				0.272637
30	15	50.8347	25.2427				0.137374
30	16	50.7054	24.959
31	1	44.9969	27.3597	0.191044	26.7982		7.50951
31	2	44.9919	27.363	0.218972	8.44627	-18.3519	13.5185
31	3	41.4758	29.6467	1.68318	29.5654	21.1192	19.2576
31	4	45.5085	27.1013	0.132098	346.555	-43.0103	26.2873
31	5	45.6417	27.2665	1.13324	188.662	-157.893	34.0854
31	6	45.8678	27.1552	3.08398	209.481	20.8187	45.9864
31	7	45.894	27.1935	3.11427	211.094	1.61305	60.2823
31	8	42.2807	27.7785	2.08984	221.933	10.8392	74.4038
31	9	37.8139	31.7084	1.52893	269.348	47.4142	87.8536
31	10	37.8935	32.0185	1.62513	254.198	-15.1493	101.713
31	11	37.6167	31.9682	2.06916	238.039	-16.159	120.418
31	12	37.7616	36.2948	0.268596	278.974	40.9345	138.412
31	13	36.5659	36.7097	0.314045	266.933	-12.0402	152.093
31	14	34.3308	37.2347	1.81906	321.41	54.4767	171.758
31	15	37.8873	37.0908	1.56614	243.332	-78.0781	192.143
31	16	36.5155	37.6505	1.16174	265.79	22.4576	217.512
31	17	38.5963	40.6386	0.176891	77.8658	172.076	240.702
31	18	35.7786	41.2894	1.17663	22.8709	-54.9949	262.112
31	19	36.2596	41.1263	1.49004	290.134	-92.7366	287.618
31	20	38.7079	40.1198	1.70688	259.759	-30.3756	315.331
31	21	39.031	39.9175	1.83217	255.566	-4.1924	350.451
31	22	37.7983	45.3232	0.0450668	153.269	-102.298	368.337
31	23	37.7975	45.1589	0.0375488	134.903	-18.3658	370.787
31	24	37.6609	45.2405	0.0403341	77.2509	-57.652	367.06
31	25	37.6776	45.2624	0.0922768	59.4503	-17.8006	362.126
31	26	37.7179	45.0791	0.119361	351.026	-68.4248	358.606
31	27	37.6876	45.1225	1.87083	327.879	-23.147	356.332
31	28	37.8183	45.024				400.364
31	29	38.0716	45.1349				436.972
31	30	42.4409	48.1067
32	1	3.32148	27.6918	0.150814	95.9629		4.39816
32	2	2.95043	27.6644	0.175408	48.0261	-47.9368	9.56866
32	3	3.04904	27.7899	0.158667	59.7452	11.719	18.954
32	4	3.27448	27.2418	0.0243039	143.843	84.0977	29.5546
32	5	3.30236	27.2732	0.152667	128.684	-15.1588	43.0552
32	6	3.28888	27.3787	0.164406	66.7973	-61.8868	57.2353
32	7	3.21561	27.1988	0.102206	58.1331	-8.66417	75.1312
32	8	3.0161	26.9157	0.0792214	34.2889	-23.8442	93.6502
32	9	3.4832	26.9254	1.47666	330.817	-63.4723	117.328
32	10	3.37749	26.9384	1.54701	330.575	-0.241604	142.074
32	11	3.21246	26.7818	1.32491	304.652	-25.9228	167.581
32	12	7.35085	29.0855	0.241315	278.241	-26.411	190.049
32	13	7.41982	29.2184	1.51298	218.326	-59.915	215.519
32	14	5.47247	30.0515	0.75886	219.549	1.2225	237.763
32	15	7.45462	29.8019	2.79302	214.7	-4.84864	263.086
32	16	3.85905	32.0332	1.17683	216.705	2.00537	283.758
32	17	3.71704	31.501	2.19336	255.784	39.0789	310.733
32	18	0.565825	34.572	2.50932	294.597	38.8126	334.043
32	19	1.02859	34.1434	3.66036	277.392	-17.2053	361.505
32	20	2.10116	37.8796	2.30828	271.452	-5.94003	383.64
32	21	3.69921	41.4168	2.37909	239.988	-31.4639	401.664
32	22	2.44133	45.0332	1.1406	227.211	-12.7767	409.925
32	23	2.27659	44.8023	1.18101	232.728	5.51637	422.216
32	24	0.129271	47.5971	0.0391744	103.915	-128.812	421.67
32	25	0.116911	47.5443	0.15089	271.696	167.781	422.585
32	26	0.130906	47.6217	0.175872	271.771	0.0750736	422.095
32	27	0.101008	47.4831	0.179754	267.313	-4.45828	422.708
32	28	0.130308	47.9968				425.63
32	29	0.147212	48.1491				423.841
32	30	0.075725	48.0217
33	1	7.40666	29.3314	1.55282	223.01		11.9378
33	2	7.3231	29.3906	1.31318	226.453	3.44352	22.5341
33	3	3.89572	32.4559	0.651782	234.673	8.22032	39.1819
33	4	4.00021	32.509	2.19604	249.741	15.0678	63.7351
33	5	4.60897	32.246	2.18533	245.829	-3.9125	93.7085
33	6	2.76506	34.0512	4.09009	269.281	23.4525	129.771
33	7	1.719	38.6896	2.68858	273.815	4.53372	170.713
33	8	1.92452	38.2272	2.71964	274.37	0.555433	219.578
33	9	2.61115	46.3205	2.08683	290.151	15.7803	265.24
33	10	2.25566	46.7374	1.99582	297.66	7.50903	320.577
33	11	2.54627	46.3624	1.92433	272.728	-24.9319	390.635
33	12	4.76783	52.1978	1.74154	204.137	-68.5912	446.692
33	13	5.03516	52.0406	1.9056	210.817	6.68046	520.919
33	14	2.82102	52.1288	1.31353	231.031	20.2136	623.581
33	15	0	54.3342	0.671817	305.563	74.5325	685.037
33	16	0.125536	54.9694	0.415871	310.172	4.60826	769.25
33	17	0.342782	55.1925	2.08029	269.597	-40.5748	839.481
33	18	1.17219	55.9737	1.93	303.922	34.3248	914.596
33	19	0.930344	55.9227	2.84557	269.312	-34.6095	1036.12
33	20	0.298865	61.4333				1134.95
33	21	4.40335	60.7783				1277.22
33	22	0.82786	64.4588
34	1	32.2696	29.2774	0.239782	79.0679		13.3531
34	2	32.4493	29.2404	2.03258	330.607	-108.461	25.8112
34	3	32.3105	29.0801	2.11829	330.091	-0.515638	39.7662
34	4	32.406	28.5711	3.10592	2.41987	32.3289	51.7929
34	5	37.762	32.2332	0.118106	71.1157	68.6958	62.302
34	6	37.819	32.2488	1.46368	240.483	169.368	75.0627
34	7	41.7155	28.1777	3.31477	232.633	-7.85054	75.6394
34	8	37.8767	31.898	1.45871	259.503	26.8701	90.7531
34	9	35.6556	36.07	1.76437	325.749	66.2461	118.292
34	10	35.6801	36.081	1.79029	310.747	-15.0016	174.452
34	11	37.0794	36.2008	2.94796	325.133	14.3853	204.331
34	12	40.0308	39.049				225.862
34	13	39.1858	40.1499				289.094
34	14	44.3357	41.2567
35	1	48.9907	28.9176	1.66458	289.794		11.7292
35	2	49.0332	28.839	1.65922	289.513	-0.281008	20.3368
35	3	49.1347	28.8449	1.64742	288.344	-1.16964	30.5233
35	4	50.6819	33.6163	0.0504954	266.291	-22.053	53.3828
35	5	50.6959	33.5308	0.170757	266.973	0.681985	61.5329
35	6	50.6901	33.536	0.17651	267.589	0.615978	71.0004
35	7	50.6721	33.7675	0.165995	263.857	-3.73161	83.4251
35	8	50.6688	34.0423	2.74492	264.215	0.358214	110.935
35	9	50.6678	34.065	2.73461	264.398	0.182482	147.882
35	10	50.6188	34.2626	2.6584	263.72	-0.678228	201.932
35	11	49.8388	42.2352	2.62644	275.1	11.3808	269.926
35	12	49.867	42.2297				315.156
35	13	49.7463	42.1899				450.384
35	14	50.5393	50.0833
36	1	22.7893	30.0643	0.253125	81.7466		3.60337
36	2	22.8874	29.6147	0.278956	93.4397	11.6931	7.90292
36	3	22.8998	29.3192	0.197236	105.044	11.6045	13.2157
36	4	22.8983	29.3128	1.44271	214.546	109.501	19.8825
36	5	22.8372	28.7793	2.73986	239.961	25.4155	25.2653
36	6	22.7462	28.7478	2.79232	240.234	0.272523	31.6157
36	7	19.3333	31.7671	1.50005	261.774	21.5404	35.8555
36	8	18.7225	35.8949	0.0626173	251.553	-10.2204	38.9846
36	9	18.5874	36.0195	0.039672	49.5732	158.02	42.3501
36	10	18.6895	36.221	0.126694	93.712	44.1388	45.8345
36	11	18.6631	36.0731	1.13649	119.828	26.116	50.9263
36	12	18.6645	35.9289	0.27845	114.39	-5.43762	54.7734
36	13	18.6648	35.8417	0.404332	85.6458	-28.7446	61.6666
36	14	16.9672	33.1153	0.777118	307.154	-138.492	69.3535
36	15	18.3196	35.1681	1.56686	329.408	22.2536	77.3945
36	16	18.7569	34.6322	1.51687	323.242	-6.16583	86.9246
36	17	18.3753	34.9734	2.6981	294.655	-28.5868	93.8044
36	18	22.3659	37.5603	1.70921	267.669	-26.9865	105.242
36	19	22.4028	37.3554	1.62016	264.834	-2.83469	118.818
36	20	21.7518	42.3298	0.11763	49.8845	145.051	125.543
36	21	22.1573	42.6837	0.219545	107.806	57.9219	133.255
36	22	21.9651	42.1962	0.0396534	151.7	43.8939	143.982
36	23	21.9792	42.0599	0.0718766	195.506	43.8061	158.23
36	24	21.9559	42.0566	0.114803	192.34	-3.16641	166.182
36	25	21.8604	42.1398	0.0603024	180.915	-11.4253	163.405
36	26	21.7714	42.1176	0.0673211	187.391	6.47672	159.474
36	27	21.6194	42.1302	0.0261172	343.647	156.256	157.321
36	28	21.6795	42.1427				153.003
36	29	21.5711	42.1436				147.317
36	30	21.6946	42.1523
37	1	18.8968	31.2263	2.24373	227.341		10.8061
37	2	17.8446	34.7204	1.27458	205.554	-21.7873	34.2983
37	3	14.2597	35.9806	1.64263	277.621	72.0668	62.0427
37	4	14.3355	36.1764	3.69322	283.912	6.29142	100.577
37	5	14.3949	36.3698	4.3223	284.968	1.05614	148.93
37	6	14.9132	40.8649	2.44792	295.221	10.2528	192.148
37	7	16.9994	46.931	0.764141	317.826	22.6051	217.614
37	8	17.744	48.8968				227.814
37	9	18.0424	47.5086				297.39
37	10	18.6984	48.4701
38	1	4.50633	32.0514	0.913622	227.92		11.4752
38	2	4.01557	32.1915	0.873328	238.174	10.2541	31.3388
38	3	2.8318	34.0124	1.49884	251.413	13.2388	58.3192
38	4	2.6695	34.0858	4.03206	265.816	14.4027	103.827
38	5	2.63395	34.4176	3.9556	267.083	1.26756	159.76
38	6	1.39857	38.2743	2.80975	275.7	8.61638	233.585
38	7	1.78693	46.1497	2.30346	297.423	21.723	310.112
38	8	2.03014	46.269	2.20623	296.678	-0.74441	377.051
38	9	2.23573	46.6619	3.09485	279.712	-16.9666	438.58
38	10	4.96952	52.2836	1.18523	252.824	-26.8883	478.089
38	11	5.0018	52.183				558.44
38	12	3.80196	55.8134				558.686
38	13	3.91947	55.6807
39	1	2.8605	34.0586	1.50901	250.219		8.15738
39	2	2.70736	34.4967	1.36839	249.15	-1.06829	20.489
39	3	1.55712	38.2258	2.39256	270.04	20.8901	38.0837
39	4	1.32841	38.3185	3.45238	265.066	-4.97381	63.9822
39	5	1.24625	38.333	4.71937	284.644	19.5774	97.1069
39	6	1.56217	45.4035	2.56377	295.874	11.2299	132.75
39	7	0.437693	48.6373	2.69979	294.271	-1.60258	175.058
39	8	4.82558	52.0312	1.36618	256.821	-37.4504	219.221
39	9	4.91858	52.3238	2.93265	271.917	15.0964	269.945
39	10	3.76699	56.0208	1.72439	287.185	15.2673	322.632
39	11	3.89112	56.0218	2.26603	307.659	20.4742	385.5
39	12	5.21292	61.1168	1.5877	4.73353	57.0748	444.713
39	13	5.2954	60.963	1.66758	0.577018	-4.15651	515.625
39	14	8.04445	61.4036	2.08958	308.632	-51.9455	593.236
39	15	9.95978	60.7237	2.79333	289.759	-18.8725	679.535
39	16	10.2979	60.9126	2.57011	288.022	-1.7375	778.651
39	17	11.9581	66.3006	2.33411	281.764	-6.25794	868.286
39	18	12.7928	68.6103	1.55094	276.732	-5.03199	961.205
39	19	12.6833	68.2447	1.60102	277.256	0.524047	1074.38
39	20	13.3857	73.1559	1.02572	246.736	-30.5195	1153.12
39	21	13.3382	73.2311	0.939892	243.722	-3.01407	1251.43
39	22	13.2899	73.0093	1.01258	246.524	2.80213	1358.95
39	23	12.1703	75.9829	0.0513099	29.1837	142.66	1464.68
39	24	12.0898	75.7594	0.257966	5.04158	-24.1422	1565.77
39	25	12.0798	75.7956	0.278419	355.489	-9.55283	1673.51
39	26	12.3047	75.9078	0.278319	319.167	-36.322	1707.76
39	27	12.8607	75.6914	0.265817	276.675	-42.4922	1769.02
39	28	12.9124	75.8613				1883.37
39	29	12.9364	76.4538				1901.73
39	30	12.9534	76.4834
40	1	18.0109	34.6808	2.20786	243.651		14.3366
40	2	14.4028	36.1222	1.6559	277.032	33.3813	26.182
40	3	15.1353	40.008	1.79845	243.282	-33.7497	32.9677
40	4	15.0711	40.6162	1.58889	240.931	-2.35113	46.3309
40	5	15.011	41.0525	1.41408	241.249	0.317879	72.1599
40	6	12.7096	44.8274	0.120113	327.018	85.7684	82.2111
40	7	12.7551	44.7825	0.261974	275.741	-51.2767	97.9704
40	8	12.9705	44.7718	0.323007	283.386	7.64512	118.892
40	9	13.0119	45.0235	2.74257	288.516	5.13015	148.166
40	10	12.8337	45.5644	2.54931	290.142	1.626	191.7
40	11	13.1948	45.7145	2.44808	274.186	-15.9565	247.287
40	12	15.6248	52.8253	0.10115	10.9271	96.7415	274.428
40	13	15.4673	52.7446	3.46892	348.288	-22.6387	321.98
40	14	13.7308	53.0391				404.58
40	15	15.9227	52.7678				465.552
40	16	25.6574	54.8571
41	1	14.5964	36.0898	5.59856	293.672		29.6723
41	2	15.0513	40.5359	1.78432	301.838	8.16596	50.1886
41	3	17.4991	45.1105	2.76171	251.418	-50.4194	75.9307
41	4	21.3398	51.4723	2.08146	193.021	-58.3975	77.1338
41	5	17.8751	45.0835	2.79512	250.528	57.5077	151.296
41	6	14.8589	52.9638	0.267399	348.045	97.5165	155.564
41	7	15.2559	52.8792	2.16468	256.721	-91.3234	219.079
41	8	15.0799	52.9893				320.726
41	9	15.6437	53.1299				534.756
41	10	13.7643	59.1996
42	1	24.5362	36.078	0.059442	197.307		2.00901
42	2	24.3419	36.1087	0.057344	341.712	144.405	4.98945
42	3	24.2813	36.1797	0.127615	357.635	15.923	8.74673
42	4	24.366	36.131	0.197145	336.044	-21.5916	14.4752
42	5	24.5053	36.1627	0.240337	348.816	12.7727	20.9045
42	6	24.6638	36.1955	0.248408	356.71	7.89352	27.6411
42	7	24.9064	36.3712	0.121675	19.0872	22.3774	34.2696
42	8	25.2126	36.3026	0.0318225	41.3449	22.2577	41.0603
42	9	25.4078	36.2383	0.0839861	224.881	-176.464	48.2334
42	10	25.2514	36.2518	0.0633461	247.823	22.9419	56.0379
42	11	25.2843	36.2395	0.872338	200.834	-46.9891	64.4288
42	12	25.2293	36.4161	2.28347	240.007	39.1725	73.5658
42	13	25.1797	36.4278	2.23493	241.673	1.66679	84.2599
42	14	22.8384	37.1703	2.15675	265.168	23.4946	95.413
42	15	21.8048	42.3491	1.77747	274.368	9.20048	104.568
42	16	21.9983	42.3297	1.83605	269.345	-5.02319	115.312
42	17	22.2933	43.6175	1.56387	292.482	23.1367	120.925
42	18	22.2109	47.666	0.603582	357.695	65.2127	120.029
42	19	21.9353	47.8375	0.832262	11.1753	13.4807	118.389
42	20	24.0874	47.9526	0.374011	79.601	68.4257	116.428
42	21	24.0202	47.7389	0.319716	72.4021	-7.19882	114.596
42	22	24.3848	47.3536	0.27464	70.7277	-1.67448	113.397
42	23	24.2899	46.849	0.0822076	15.3077	-55.42	113.678
42	24	24.3102	46.8246	0.101165	16.863	1.55535	114.434
42	25	24.6567	46.5759	0.0458991	262.455	-114.408	115.811
42	26	24.5278	46.7838	0.0795053	308.798	46.3432	116.579
42	27	24.6006	46.7366	0.184714	295.035	-13.7627	117.927
42	28	24.6386	46.7124				121.384
42	29	24.6772	46.9697				124.65
42	30	24.8351	47.2386
43	1	37.9364	36.194	2.3736	258.722		12.3024
43	2	36.2825	36.5473	2.20386	271.744	13.0228	26.1336
43	3	36.2233	36.5353	1.32347	341.07	69.3258	38.8384
43	4	36.5437	43.1772	2.45307	70.5855	89.5152	51.9763
43	5	36.4838	43.1558	2.40943	69.3034	-1.28202	65.6748
43	6	39.9789	37.8233	0.05133	328.033	-101.27	72.6661
43	7	38.9899	36.2365	0.622442	304.504	-23.5289	84.529
43	8	39.0384	36.394	2.55249	257.927	-46.5769	101.607
43	9	40.1096	37.9049	2.18692	243.776	-14.1518	118.019
43	10	40.0477	37.7753	2.31358	244.365	0.58958	142.209
43	11	37.4368	43.8821	0.782897	196.372	-47.9928	166.27
43	12	37.2105	43.7903	0.373299	249.785	53.4129	190.678
43	13	37.0449	44.0329	0.401234	271.702	21.9165	215.884
43	14	35.1834	44.5442	2.46453	267.108	-4.59366	250.204
43	15	36.8235	44.8412	2.77464	238.28	-28.8283	275.053
43	16	37.0806	45.2361	2.7195	234.101	-4.17877	306.317
43	17	34.8103	51.9283	1.90605	202.699	-31.4014	330.468
43	18	32.447	51.9218	1.21277	214.117	11.4174	360.157
43	19	32.2968	51.8449	1.08185	216.068	1.95096	395.64
43	20	29.5351	54.135	0.291873	87.0874	-128.98	422.601
43	21	29.4348	53.9624	0.266062	94.1076	7.02025	425.243
43	22	29.6734	53.7557	0.25391	124.978	30.8699	430.789
43	23	29.5796	53.2605	3.85534	318.076	-166.902	445.55
43	24	29.3777	53.1663	3.98702	318.844	0.768336	463.799
43	25	29.2367	53.1315	4.00138	319.015	0.171204	498.44
43	26	38.185	60.9883	0.149299	343.864	24.8486	543.131
43	27	38.3834	61.038	0.199229	294.393	-49.471	619.25
43	28	38.2984	61.0045				626.837
43	29	38.6153	61.1128				645.051
43	30	38.6302	61.5824
44	1	9.82656	37.2233	0.268388	181.87		10.9231
44	2	9.16665	37.2738	0.0901637	112.792	-69.0773	30.3351
44	3	9.09571	37.2619	0.24427	81.5328	-31.2595	54.3119
44	4	9.02183	37.2496	0.113723	45.9275	-35.6053	84.3518
44	5	9.06187	37.0244	0.073363	5.23183	-40.6957	119.035
44	6	9.20361	36.5371	0.3004	315.662	-49.5696	161.314
44	7	9.25914	37.0045	0.0744028	258.431	-57.231	211.452
44	8	9.28104	37.0044	0.209911	341.409	82.9776	266.564
44	9	9.84818	37.1669	2.9121	292.185	-49.2242	324.399
44	10	9.21437	37.2232	2.94339	296.151	3.9662	393.831
44	11	9.87791	37.2051	2.68496	279.081	-17.0703	465.75
44	12	13.1469	45.2565	2.06567	208.567	-70.5137	544.763
44	13	13.1062	45.1495	3.42178	219.395	10.8281	634.907
44	14	11.1492	45.1591	4.31909	234.608	15.213	728.753
44	15	7.70436	48.2198	4.62023	249.406	14.7983	825.03
44	16	5.17319	51.6645	3.30278	255.524	6.11787	918.178
44	17	3.64471	55.7219	1.8248	279.983	24.459	1001.29
44	18	2.82899	61.1948	3.72937	332.057	52.0735	1074.75
44	19	2.69636	61.2583	4.38715	329.871	-2.18524	1162.44
44	20	4.59373	61.1134	4.88344	305.505	-24.3662	1218.65
44	21	12.7127	66.4375	2.18346	273.055	-32.4497	1257.78
44	22	14.0797	67.8646	1.58816	257.522	-15.5338	1294.33
44	23	13.1023	73.0397	0.0510451	6.56575	109.044	1291.66
44	24	13.0618	72.9786	0.192355	68.8559	62.2901	1288.92
44	25	13.0502	72.5165	0.139037	34.6052	-34.2507	1284.16
44	26	13.2544	73.0222	1.11105	171.49	136.885	1276.73
44	27	13.27	72.4404	1.57586	202.152	30.6618	1283.79
44	28	13.3936	72.2796				1305.91
44	29	9.95797	72.529				1369.85
44	30	8.89139	74.223
45	1	27.1702	40.2362	0.357165	220.89		6.67441
45	2	26.4616	40.3476	1.91224	214.447	-6.44281	13.3212
45	3	26.2091	40.5336	1.71748	216.505	2.05869	24.6053
45	4	26.3601	40.9376	1.6587	212.02	-4.48518	35.988
45	5	21.7308	43.5925	0.232445	43.0189	-169.001	50.4708
45	6	22.0676	43.5988	0.178326	355.58	-47.4386	67.1701
45	7	22.1411	43.576	1.8214	278.298	-77.2824	83.7115
45	8	22.2407	43.1168	1.46717	304.754	26.4561	100.593
45	9	22.601	43.64	1.3778	298.548	-6.20625	117.389
45	10	22.9297	48.983	0.919147	45.6431	107.095	129.27
45	11	24.7498	46.7331	2.24378	295.306	-110.337	144.622
45	12	24.5763	47.2709	2.47215	311.138	15.8324	153.096
45	13	24.8575	47.0114	2.60258	307.768	-3.37023	161.456
45	14	27.6271	52.8185	0.560394	341.829	34.0609	161.498
45	15	29.4554	52.8564	0.869196	205.544	-136.284	159.192
45	16	29.6395	53.1834	0.869069	204.51	-1.0341	160.765
45	17	29.2244	53.3428	2.80566	194.059	-10.4514	165.938
45	18	27.1027	53.9808	2.05353	188.018	-6.04075	177.645
45	19	27.2672	54.2651	3.98321	174.732	-13.2858	191.603
45	20	21.0596	55.3874	1.94415	163.1	-11.6321	200.567
45	21	21.0024	54.8401	2.00971	167.326	4.22531	220.866
45	22	15.368	53.168	0.205358	244.508	77.1823	231.437
45	23	15.479	53.6919	0.249163	177.492	-67.0154	243.155
45	24	15.1202	53.5173	0.194302	201.755	24.2627	259.935
45	25	15.1029	53.7241	0.351039	146.503	-55.2522	282.997
45	26	14.7322	53.6592	0.316571	144.731	-1.77188	317.802
45	27	14.5788	53.7333	0.385186	144.302	-0.428884	322.767
45	28	14.2247	53.1429				333.158
45	29	13.9568	53.1109				347.482
45	30	13.6403	53.059
46	1	14.5405	40.7613	1.52249	245.231		10.0433
46	2	12.6676	45.0544	0.00839315	184.378	-60.8529	27.5643
46	3	12.5876	45.0345	2.27324	218.106	33.7281	50.1584
46	4	12.6269	44.9086	2.27793	226.387	8.28086	76.9762
46	5	12.6425	45.0563	2.08937	220.515	-5.87152	112.868
46	6	7.22135	49.243	0.261737	11.1106	150.595	154.461
46	7	7.91301	49.8563	0.294236	83.4015	72.2909	204.051
46	8	7.87723	49.1283	0.120838	16.7578	-66.6437	260.219
46	9	7.99185	49.0917	0.0686748	77.4322	60.6744	323.499
46	10	8.01444	48.9795	0.0296228	61.6014	-15.8307	390.23
46	11	8.22435	49.0238	0.732857	181.17	119.568	458.783
46	12	8.03668	48.8906	1.34819	224.193	43.0231	527.137
46	13	8.0567	48.9013	2.65451	237.559	13.3664	602.419
46	14	6.02624	49.0687	3.88893	265.981	28.422	685.097
46	15	5.13674	51.71	3.29574	287.213	21.2315	764.654
46	16	3.78486	55.6221	2.24799	305.788	18.5749	835.41
46	17	5.20861	60.7068	1.79375	271.282	-34.5059	898.939
46	18	8.06259	61.1544	3.89266	275.111	3.82915	974.016
46	19	7.72863	61.0927	6.48224	268.814	-6.29686	1067.61
46	20	5.32899	66.0867	4.93413	280.354	11.5397	1158.97
46	21	9.10292	72.7859	2.71515	257.452	-22.9019	1242.3
46	22	7.32616	80.5353	0.184717	243.253	-14.1991	1276.41
46	23	7.98937	80.6481	0.40775	214.108	-29.1448	1320.08
46	24	7.33324	80.7368	0.511706	231.059	16.9512	1383.91
46	25	7.07676	81.0301	0.289614	265.399	34.3394	1460.6
46	26	6.97654	81.334	0.218968	290.629	25.2301	1490.58
46	27	6.3684	81.9308	0.343663	343.903	53.2745	1516.56
46	28	7.00706	81.8962				1579.7
46	29	7.20798	81.9488				1770.12
46	30	7.35897	82.2167
47	1	20.7715	41.1981	0.72981	295.439		5.51227
47	2	21.5588	42.908	0.85109	129.954	-165.485	14.3941
47	3	21.5788	43.1506	0.91587	126.888	-3.06624	23.9987
47	4	21.712	43.1753	0.876513	128.631	1.74242	35.8071
47	5	19.9191	40.9508	0.17296	332.641	-155.989	48.9726
47	6	19.9295	40.953	0.219887	329.184	-3.45678	63.6057
47	7	20.0704	41.1211	0.998351	317.488	-11.6969	85.3565
47	8	20.3799	41.1892	0.8541	316.696	-0.79189	112.192
47	9	20.4961	41.291	0.931081	320.837	4.14093	141.896
47	10	22.2781	43.145	0.120779	10.8435	50.0068	172.47
47	11	22.2446	42.9466	0.71404	179.885	169.041	203.18
47	12	22.6618	43.055	1.99855	208.292	28.4074	236.412
47	13	22.634	43.0768	3.82501	235.482	27.1894	274.535
47	14	20.1025	42.9423	3.57084	244.816	9.33405	317.354
47	15	17.3824	45.8967	2.73766	239.457	-5.35885	364.554
47	16	16.1314	52.5316	0.960981	189.9	-49.5564	396.573
47	17	15.5439	52.6365	0.128294	214.636	24.7354	421.577
47	18	13.2086	52.9701	1.14164	220.425	5.78913	440.867
47	19	13.2914	53.0273	2.87055	247.974	27.5494	463.277
47	20	15.2273	52.8553	3.37502	242.974	-5.00037	494.176
47	21	10.6014	55.191	2.21539	265.82	22.8463	519.994
47	22	10.0619	61.0104	0.370159	263.375	-2.44499	522.514
47	23	10.6265	61.8747	0.0855946	248.74	-14.6355	522.332
47	24	10.117	61.8195	0.0871032	265.098	16.3585	521.543
47	25	9.93374	62.1135	0.0183331	108.696	-156.402	516.843
47	26	10.5334	62.114	0.330226	175.797	67.1009	512.753
47	27	10.0946	62.0799	0.149642	161.033	-14.7637	519.386
47	28	9.91611	62.0614				531.899
47	29	9.54535	62.0414				553.218
47	30	9.67008	61.934
48	1	47.7807	41.3107	0.256419	161.657		7.40682
48	2	48.096	41.237	0.418387	181.157	19.4998	10.4308
48	3	47.1976	40.9652	0.30455	173.965	-7.19162	13.6192
48	4	47.0505	41.0686	0.267671	173.634	-0.331058	20.1017
48	5	46.8411	41.2624	1.08988	340.692	167.058	22.8013
48	6	46.2891	40.8692	1.50592	338.029	-2.66257	23.2811
48	7	46.2524	40.9795	1.33192	338.289	0.259181	27.6972
48	8	49.9269	42.3435	2.54384	270.272	-68.0167	34.2144
48	9	50.4787	42.5594				42.961
48	10	49.9648	42.4577				79.8319
48	11	49.9631	49.9749
49	1	48.4911	41.2894	2.94105	284.649		7.35105
49	2	50.7091	49.7002	0.034898	293.97	9.32081	10.702
49	3	50.6849	49.68	0.0530865	212.561	-81.4091	11.6611
49	4	50.7225	49.8257	0.076439	88.9973	-123.564	12.6027
49	5	50.7517	49.7959	1.31823	269.353	-179.644	15.9294
49	6	50.5507	49.7657	1.28252	272.803	3.4496	18.3253
49	7	50.7265	49.5964	1.28919	270.97	-1.83249	23.8456
49	8	50.707	53.7503	1.35551	201.851	-69.1196	26.1199
49	9	50.7388	53.6087	1.36225	204.556	2.705	27.0801
49	10	50.792	53.4634	1.3069	207.779	3.22293	26.246
49	11	46.9327	55.2638	1.17323	20.1151	172.336	24.5272
49	12	47.0217	55.307	0.187711	20.5211	0.405987	25.0015
49	13	47.3231	55.2907	0.258616	11.3396	-9.18149	23.5313
49	14	50.2377	54.0534	0.927848	215.925	-155.414	22.7051
49	15	47.5491	55.1096	1.13488	21.6897	165.765	24.683
49	16	48.0838	55.1382	0.938573	36.9612	15.2716	28.3485
49	17	47.9836	55.6866	1.64399	53.2514	16.2902	27.1457
49	18	50.7127	53.8513	0.588838	85.8116	32.5601	31.3788
49	19	50.3337	53.4451	1.11934	228.213	142.401	35.4485
49	20	50.9344	51.7347	1.72526	235.56	7.34712	43.3886
49	21	50.8417	52.0896	0.133387	274.567	39.0072	57.2171
49	22	48.096	55.949	0.320193	340.008	65.4408	63.8888
49	23	48.0073	56.0033	0.485273	215.513	-124.496	65.7542
49	24	50.8736	52.4884	1.74607	225.972	10.4596	84.3956
49	25	48.9987	56.2774	0.2691	180.787	-45.1853	92.2877
49	26	46.8223	56.8489	0.468168	357.151	176.364	97.0692
49	27	47.233	56.2547	0.628203	336.757	-20.3938	113.287
49	28	48.1915	56.2885				150.328
49	29	48.2251	56.9188				246.999
49	30	48.9646	56.9985
50	1	21.774	42.7965	1.57965	298.946		15.0697
50	2	24.0819	46.6598	0.247649	268.327	-30.6187	21.3795
50	3	24.018	46.8965	0.216877	305.611	37.2846	34.7729
50	4	24.0675	46.9435	0.164631	289.232	-16.3791	42.0005
50	5	24.0602	47.4024	0.230239	359.492	70.2598	49.3604
50	6	24.3968	47.4255	0.633496	222.543	-136.949	58.4064
50	7	24.2302	47.4098	2.35888	321.087	98.5442	72.4831
50	8	24.7509	47.4086	2.26661	318.109	-2.9782	94.7031
50	9	22.9966	48.7105	4.58104	295.543	-22.5661	144.121
50	10	29.7366	51.8549				190.319
50	11	29.8128	51.9489				386.498
50	12	28.9225	61.1104
51	1	32.8241	42.9831	0.136636	188.079		10.9794
51	2	32.4264	42.9358	0.0173364	279.452	91.3733	26.4593
51	3	32.4609	43.0362	0.110662	11.0832	91.6312	45.2201
51	4	32.4183	43.0407	0.104655	10.5192	-0.563982	64.7453
51	5	32.435	42.9871	0.122157	347.917	-22.6023	84.6173
51	6	32.7867	42.9724	0.0399445	330.452	-17.4653	110.712
51	7	32.727	42.9834	0.167625	356.905	26.4532	141.797
51	8	32.7933	43.0638	0.180645	6.87387	9.9691	177.739
51	9	32.8909	43.0315	2.48717	286.62	-80.2537	219.653
51	10	33.2291	43.0106	3.68902	296.661	10.0407	264.687
51	11	33.3314	42.9989	5.9079	295.908	-0.753008	318.322
51	12	35.0251	50.1813	3.4212	284.319	-11.5888	379.966
51	13	38.195	52.901	2.7647	223.354	-60.9648	440.46
51	14	41.0753	58.9414	3.49293	216.653	-6.70159	495.712
51	15	37.5635	60.126	3.05747	216.153	-0.4998	552.337
51	16	32.1642	58.5949	2.39566	256.037	39.8841	626.751
51	17	32.6685	65.1968	0.149006	237.826	-18.2105	695.39
51	18	30.1573	65.5372	0.762371	354.965	117.138	755.626
51	19	30.43	65.5695	1.57538	295.537	-59.4277	817.107
51	20	32.4305	65.5752	1.44592	272.911	-22.626	847.324
51	21	32.4356	65.7379	1.3256	275.948	3.03751	883.71
51	22	32.4674	69.8339	1.02986	176.231	-99.7171	904.188
51	23	32.6507	69.9074	1.05144	172.367	-3.86453	930.376
51	24	32.8477	69.6933	1.08628	175.632	3.26521	966.629
51	25	29.3845	69.6309	2.79239	279.935	104.304	1015.48
51	26	29.5244	69.4884	2.8208	278.899	-1.03663	1091.85
51	27	29.5983	69.4451	2.85884	279.041	0.142138	1220.74
51	28	30.8299	77.8824				1222.66
51	29	30.8334	77.8489				1223.77
51	30	30.9461	77.9151
52	1	37.2167	43.2034	3.1215	290.972		13.9941
52	2	36.5188	43.1744	3.3034	294.744	3.77204	26.4045
52	3	36.5464	43.1728	3.34083	295.585	0.840695	41.7443
52	4	40.5683	51.9476	0.110167	0.785691	65.2009	53.5053
52	5	40.6669	52.1747	0.080095	59.7653	58.9796	70.864
52	6	40.8745	52.2126	2.38083	284.511	-135.255	100.501
52	7	40.8988	51.943	2.43662	284.941	0.430782	144.614
52	8	40.7879	51.9671	3.71058	290.157	5.21568	196.73
52	9	42.6641	59.1273	1.42685	311.944	21.787	238.123
52	10	42.7835	59.0057	1.39077	311.495	-0.449373	275.293
52	11	44.6238	62.417	0.55365	177.653	-133.842	298.416
52	12	45.5253	62.3111	1.60948	268.015	90.3618	350.03
52	13	45.5479	62.1309	0.0468717	302.316	34.3018	408.401
52	14	42.9642	62.349	0.925506	359.569	57.2528	512.967
52	15	45.358	67.1367				443.469
52	16	45.623	62.2497				440.012
52	17	45.7407	62.3699
53	1	12.7431	44.9625	2.67455	280.981		7.73484
53	2	17.0918	47.5355	1.99544	243.666	-37.315	21.0298
53	3	14.6681	52.8375	1.61001	208.59	-35.0762	35.2504
53	4	14.2715	52.8392	1.45336	212.225	3.63526	51.0177
53	5	14.4362	52.9006	1.51503	211.421	-0.804215	66.4439
53	6	10.427	55.1488	0.0649621	344.212	132.791	81.0028
53	7	10.583	55.1642	0.0568077	196.165	-148.047	97.2625
53	8	10.5576	55.27	0.0702178	65.9608	-130.204	115.149
53	9	10.6145	55.2018	0.0175359	21.2582	-44.7027	135.765
53	10	10.4193	55.2117	0.160723	14.6296	-6.6286	156.738
53	11	10.6435	55.0776	0.593236	183.939	169.309	172.613
53	12	10.6635	55.1828	0.202861	44.5557	-139.383	179.935
53	13	10.8859	55.0899	0.186125	53.1074	8.55169	187.597
53	14	8.86795	55.1999	0.738205	19.9464	-33.1609	198.141
53	15	11.0972	54.7558	0.875881	185.791	165.844	213.284
53	16	11.2211	54.6433	0.961138	188.102	2.31087	231.961
53	17	10.9497	54.4444	2.18998	264.475	76.3736	249.044
53	18	8.48295	55.0209	4.77037	295.159	30.6841	273.723
53	19	8.36645	55.0497	6.15568	302.178	7.01848	311.686
53	20	10.3172	60.9838	4.11907	309.659	7.48137	350.772
53	21	14.5671	67.9743	1.45441	324.267	14.6083	373.429
53	22	18.201	70.6802	0.212478	84.8933	120.626	382.419
53	23	18.2038	70.4971	0.176262	92.4664	7.57311	394.737
53	24	18.109	70.5224	0.148083	87.0025	-5.46396	410.266
53	25	18.2578	70.0453	0.129446	260.911	173.908	435.412
53	26	18.181	69.9688	0.336701	292.321	31.4104	469.182
53	27	18.1322	70.0788	0.398928	313.095	20.7737	524.327
53	28	18.1964	70.4287				629.314
53	29	18.5647	70.9032				714.014
53	30	18.9498	70.9527
54	1	2.54259	45.8118	2.04418	289.47		13.6351
54	2	1.99199	45.5192	2.34338	296.15	6.67953	25.9251
54	3	4.5024	51.6069	1.57655	251.735	-44.4151	39.4537
54	4	4.58668	51.5937	1.58169	256.07	4.33481	61.8249
54	5	5.09033	51.8298	3.75669	245.405	-10.6644	90.8295
54	6	3.02005	56.0982	1.87111	295.193	49.7879	121.858
54	7	3.44434	56.1992	1.73775	292.883	-2.31034	163.142
54	8	0.399746	62.0774	2.63427	328.103	35.22	204.541
54	9	5.40948	61.1776	1.79207	288.462	-39.6407	259.283
54	10	5.4715	61.0022	2.36381	236.317	-52.1451	322.287
54	11	7.1092	66.2532	2.52672	211.544	-24.7725	371.935
54	12	7.112	66.2771	3.04922	255.72	44.1759	440.753
54	13	1.53861	66.9031	2.09183	256.75	1.02969	522.659
54	14	0.649134	70.2188	2.34993	265.654	8.90358	601.682
54	15	4.85568	75.1421	1.57324	217.011	-48.643	667.903
54	16	0.100275	73.0115	1.75765	278.107	61.0959	771.323
54	17	0.114863	77.2484	0.395264	22.0493	103.943	858.136
54	18	1.08688	77.9832	1.39279	294.145	-87.9043	944.716
54	19	0.843833	78.2318	2.72738	279.822	-14.3231	1052.48
54	20	1.21393	76.8032	3.15327	275.236	-4.58609	1201.33
54	21	2.79603	81.7961	1.68126	262.019	-13.2165	1309.77
54	22	2.2396	86.294	0.340169	250.756	-11.263	1405.88
54	23	2.07719	86.2235	2.00242	315.066	64.3096	1540.4
54	24	2.09576	86.791	1.9829	316.037	0.970583	1657.22
54	25	1.90325	87.2575	1.95454	320.505	4.4689	1817.06
54	26	6.32983	90.4664	0.225269	268.231	-52.2746	1900.02
54	27	6.37753	90.9206	1.39809	275.116	6.8848	2017.5
54	28	6.42812	90.9868				2274.86
54	29	6.30897	91.1419				2446.86
54	30	6.75151	95.0982
55	1	25.0212	46.2554	0.963594	0.875808		8.56495
55	2	27.9401	46.3938	0.0639617	277.666	-83.2098	15.1543
55	3	27.9033	46.2517	0.12327	310.792	33.1264	21.911
55	4	27.9116	46.2112	0.136382	304.936	-5.85677	30.0138
55	5	27.9657	46.584	0.141114	61.4313	116.496	43.6017
55	6	28.1449	46.5317	0.171503	106.352	44.9203	57.0779
55	7	28.1459	46.5466	0.164693	84.2261	-22.1255	71.9
55	8	28.1682	46.2122	0.0426265	84.386	0.159879	87.4656
55	9	28.0001	46.038	2.06963	286.656	-157.73	107.398
55	10	28.1956	46.055	2.13525	284.33	-2.32634	120.337
55	11	28.1807	46.0849	3.53167	317.286	32.9566	141.127
55	12	29.7797	51.9863	1.54159	17.1267	59.8404	158.145
55	13	29.781	52.2615	1.72858	10.0573	-7.06934	180.073
55	14	35.9654	53.2719	0.729959	343.553	-26.5039	195.986
55	15	34.1994	50.6244	1.30345	297.409	-46.1446	218.76
55	16	34.8871	51.3559	0.971872	295.56	-1.84856	241.156
55	17	38.0657	53.8919	0.0470231	54.2228	118.662	265.352
55	18	35.9995	54.0958	0.655448	15.3911	-38.8317	295.132
55	19	36.1451	53.9861	2.37089	279.917	-95.4744	334.773
55	20	38.1482	53.7774	2.31936	264.166	-15.7506	351.151
55	21	37.8953	53.5739	2.2916	267.823	3.65678	371.873
55	22	37.37	60.9925	1.51266	171.241	-96.5815	378.987
55	23	37.4409	60.6995	2.23693	226.457	55.2153	390.262
55	24	37.6342	60.4437	2.3444	227.639	1.18185	403.46
55	25	32.8849	60.3015	1.76277	273.107	45.468	442.145
55	26	32.8178	65.5638	0.0816688	351.988	78.8815	457.701
55	27	32.8952	65.6406	1.49866	269.155	-82.8333	476.565
55	28	33.1715	65.5821				513.182
55	29	33.0604	65.598				631.25
55	30	32.8288	70.1361
56	1	27.9585	46.3803	3.92675	330.425		13.9275
56	2	34.0778	50.5875	0.342461	336.312	5.88633	26.8611
56	3	37.2718	52.0066	0.37784	348.606	12.2945	37.5955
56	4	38.204	52.1945	0.0270748	6.42058	17.8143	53.574
56	5	35.0187	51.0002	1.20453	338.169	-28.2514	75.0993
56	6	38.383	52.2305	0.782407	6.07262	27.9034	94.2516
56	7	38.2847	52.1855	0.0698715	303.843	-62.2297	104.697
56	8	38.3731	52.344	0.834602	7.32853	63.4856	125.079
56	9	40.7171	51.9822	0.0927447	12.9651	5.63659	147.137
56	10	38.4014	52.3596	2.4429	5.69918	-7.26594	166.473
56	11	40.8565	52.0246	0.954583	2.39208	-3.3071	190.526
56	12	40.9882	51.9197	0.192768	11.4783	9.08625	221.158
56	13	45.6939	51.6318	1.29241	181.756	170.278	245.966
56	14	43.7177	51.9051	0.63106	188.195	6.43927	259.722
56	15	41.5549	51.8047	1.85319	313.711	125.516	279.245
56	16	41.8185	51.7506	1.92782	314.498	0.786545	304.389
56	17	41.8439	52.175	2.34401	332	17.5024	340.786
56	18	45.3967	55.8233	0.865833	354.542	22.5422	370.355
56	19	45.872	55.8758	1.80544	283.709	-70.8334	403.186
56	20	48.0528	55.4763	1.06629	264.854	-18.8553	438.717
56	21	47.9824	56.0704	0.570596	245.91	-18.943	480.938
56	22	47.1556	61.1378	2.10855	257.111	11.2009	522.413
56	23	47.7659	58.6623	3.21854	258.238	1.12617	584.013
56	24	47.2838	57.6331	3.74483	264.098	5.86034	677.081
56	25	45.7446	67.3041	3.84865	280.13	16.0326	760.999
56	26	45.7975	68.1151	3.57224	281.143	1.01265	854.447
56	27	46.1285	68.808	3.29087	280.477	-0.666059	1076.04
56	28	47.7755	78.6701				1204.08
56	29	47.8686	78.6298				1431.31
56	30	47.9238	78.516
57	1	0.272945	47.6169	0.921321	59.4135		5.82754
57	2	1.88179	45.6122	0.12197	133.907	74.4936	14.4034
57	3	0.273943	48.7266	0.22581	354.495	-139.412	26.9179
57	4	1.67935	45.2375	3.12409	259.678	-94.8172	41.4401
57	5	1.62803	45.3486	3.16586	260.574	0.896439	58.7798
57	6	0.948248	48.7916	1.92547	260.651	0.076287	77.4468
57	7	0	54.4581	0.0743853	90	-170.651	95.9245
57	8	0.07262	54.718	0.0405439	64.2507	-25.7493	116.262
57	9	0.00984	54.4912	0.0493338	61.8607	-2.39002	138.822
57	10	0	54.2349	0.0985843	292.357	-129.504	166.191
57	11	0.125461	54.6084	0.606903	324.785	32.4282	197.597
57	12	0.07964	54.3607	1.25177	340.026	15.2414	233.855
57	13	0.112497	54.5084	2.69124	309.839	-30.1871	273.294
57	14	1.61297	55.6583	3.37582	327.896	18.0567	316.433
57	15	3.60908	55.6435	4.43478	322.704	-5.19249	355.758
57	16	5.28481	60.7078	3.13051	341.982	19.2786	386.86
57	17	10.1918	61.0406	2.16798	341.404	-0.578342	413.341
57	18	14.1928	63.7051	0.837573	12.8833	31.4795	423.428
57	19	14.2158	63.6127	0.765242	7.74426	-5.13908	435.706
57	20	16.3561	63.1147	0.183424	311.707	-56.0377	445.93
57	21	16.6423	63.1449	0.182895	227.384	-84.3225	455.992
57	22	16.4906	63.3033	0.0975815	198.997	-28.3868	469.797
57	23	16.7223	63.5255	0.238018	141.335	-57.6624	486.573
57	24	16.2708	63.5486	0.0450468	103.537	-37.7977	509.306
57	25	16.2138	63.3986	0.0188782	220.907	117.37	522.007
57	26	16.1647	63.0794	0.157743	274.047	53.1406	520.553
57	27	16.2392	63.4173	0.374676	351.08	77.0329	514.1
57	28	16.171	63.4357				535.015
57	29	16.1981	63.5514				546.803
57	30	17.3496	63.5915
58	1	7.29087	49.2759	0.17877	252.452		8.15368
58	2	6.91147	49.4701	0.192354	282.043	29.5911	16.9133
58	3	7.44612	49.8444	1.03712	220.478	-61.5644	32.5083
58	4	7.12916	49.7872	0.92845	220.98	0.501655	48.8078
58	5	7.03187	50.0344	2.37637	239.686	18.7058	70.9983
58	6	5.07946	51.8642	1.52718	249.132	9.44576	95.8963
58	7	5.0264	51.6139	3.27964	246.305	-2.82643	128.194
58	8	3.43353	56.1888	1.74511	291.364	45.059	163.125
58	9	3.44742	56.1452	2.50451	245.314	-46.0498	201.593
58	10	1.07249	60.6234	0.0651802	124.755	-120.56	235.871
58	11	5.34074	61.0644	0.711883	179.855	55.1	274.46
58	12	0.309473	62.9721	1.75354	24.5775	-155.277	308.964
58	13	0.961023	60.4627	2.59098	314.69	-69.8872	353.331
58	14	3.20509	61.059	1.9166	299.869	-14.8211	398.978
58	15	5.09349	60.784	2.51761	310.82	10.9504	454.605
58	16	6.42754	65.9886	1.23713	346.533	35.7132	495.574
58	17	6.06862	66.045	2.80287	347.652	1.11922	539.471
58	18	10.0306	66.4998	3.10343	333.761	-13.8911	580.556
58	19	10.0369	66.853	4.04353	313.142	-20.6192	632.962
58	20	14.2827	67.8431	2.94054	297.106	-16.0355	700.279
58	21	18.3816	70.616	1.56742	268.318	-28.7883	745.566
58	22	18.3318	75.7042	0.176731	92.1197	-176.198	762.424
58	23	18.3022	75.6958	0.283314	58.9438	-33.1758	785.096
58	24	18.2435	75.3163	0.237034	38.5363	-20.4075	792.716
58	25	18.3122	75.1744	0.145619	354.278	-44.2584	807.419
58	26	18.7407	74.9677	0.358866	299.593	-54.6853	819.64
58	27	18.7998	74.8732	0.603993	298.262	-1.33026	837.925
58	28	18.7469	75.2179				872.014
58	29	19.2723	75.9039				892.417
58	30	19.6578	76.4692
59	1	50.7005	49.7242	1.39286	263.786		13.0814
59	2	50.2815	53.9962	0.0296081	73.8317	170.046	23.9696
59	3	50.2696	53.967	0.10264	28.2967	-45.535	44.3976
59	4	50.2482	53.8783	0.147146	6.89532	-21.4014	60.8676
59	5	50.3063	53.9109	1.3245	200.792	-166.104	87.2813
59	6	50.5407	53.821	1.40286	198.46	-2.3316	108.607
59	7	50.6865	53.8253	1.35651	205.326	6.86552	129.07
59	8	46.5915	55.3213	1.76052	222.345	17.019	153.031
59	9	46.5487	55.1536	1.78832	225.781	3.43599	179.644
59	10	47.008	55.5661	1.74776	219.354	-6.42657	196.134
59	11	42.6879	58.8789	1.33987	50.0798	-169.274	212.104
59	12	42.8071	58.9986	0.327864	277.341	-132.739	233.01
59	13	42.9537	58.8909	0.106356	283.005	5.66365	252.83
59	14	45.2673	55.7962	1.94985	237.761	-45.2436	283.604
59	15	42.9328	59.9741	1.02675	193.348	-44.4132	308.761
59	16	43.0255	59.2018	0.576266	229.561	36.2129	346.159
59	17	42.1469	60.7439	0.428267	47.0567	177.496	371.928
59	18	39.9358	60.6852	1.00341	14.7807	-32.276	416.025
59	19	41.9041	60.5176	2.18847	296.381	-78.3999	473.245
59	20	43.0222	59.8034	2.28288	285.443	-10.9378	548.902
59	21	42.8464	59.9172	2.50311	288.571	3.12746	622.491
59	22	44.8214	66.3992	1.984	241.166	-47.4045	691.683
59	23	44.8458	66.4047	3.7063	259.536	18.3695	779.839
59	24	45.2379	67.0356	4.91323	232.603	-26.9321	881.848
59	25	41.9509	71.6133	4.48574	269.752	37.1488	989.242
59	26	42.8264	77.3387	2.58699	267.126	-2.62615	1089.57
59	27	36.2861	78.7455	4.80823	315.111	47.9848	1197.18
59	28	41.8927	85.0704				1276.67
59	29	42.4372	85.0899				1554.34
59	30	46.5056	88.9256
60	1	5.18259	51.3346	1.75751	241.818		9.57265
60	2	4.40224	51.6018	1.64032	249.863	8.04541	21.5729
60	3	2.83992	55.9505	0.0776606	320.636	70.7735	31.7323
60	4	2.69248	55.9821	1.84674	294.441	-26.1956	44.4269
60	5	2.70811	56.2219	1.9716	302.267	7.82632	60.0788
60	6	3.02005	56.0982	2.55165	318.011	15.7435	80.7166
60	7	4.98478	61.0258	1.26253	356.449	38.438	102.58
60	8	5.86584	61.2233	0.990774	359.843	3.39475	124.805
60	9	8.70975	61.2193	0.35612	355.294	-4.549	146.746
60	10	8.76509	61.2604	1.75313	251.245	-104.05	177.238
60	11	8.83815	61.2314	2.20138	234.927	-16.3175	223.536
60	12	9.77451	61.307	1.89618	236.293	1.36538	277.223
60	13	7.07406	66.2406	2.58334	284.05	47.7577	313.584
60	14	5.0433	66.6364	2.8886	294.078	10.028	358.323
60	15	6.61764	66.0392	2.72634	270.703	-23.375	418.914
60	16	8.95558	73.7587	0.687725	166.81	-103.894	450.676
60	17	8.57883	74.5482	0.576171	71.2239	-95.5858	487.914
60	18	6.71805	74.2176	2.05284	345.174	-86.05	537.501
60	19	6.94683	73.2879	2.01141	331.875	-13.2993	606.747
60	20	9.13518	72.9116	2.86781	286.673	-45.2021	694.529
60	21	12.6715	75.7934	1.81487	254.382	-32.2901	786.265
60	22	12.2685	76.1325	1.67462	255.172	0.789849	856.981
60	23	11.6035	81.1534	1.54157	341.925	86.7525	896.213
60	24	11.2057	81.037	1.61046	341.988	0.0629036	960.733
60	25	10.9829	80.9891				1090.17
60	26	16	82.5882				1085.95
60	27	15.8003	82.531
61	1	21.6912	51.0281	0.214363	241.315		6.7873
61	2	21.4958	51.0251	0.23554	266.205	24.8897	17.1419
61	3	21.482	51.047	0.10011	230.784	-35.4215	32.0374
61	4	21.3825	51.5923	0.114073	105.034	-125.75	54.6862
61	5	21.449	51.7302	0.31446	75.2756	-29.758	80.532
61	6	21.2921	51.2797	0.56365	219.446	144.171	110.371
61	7	21.2937	51.2618	2.0261	196.614	-22.832	144.298
61	8	21.6888	50.8178	2.14616	199.536	2.9222	181.144
61	9	19.9863	52.354	2.85455	228.998	29.4613	220.376
61	10	15.4692	52.9997	3.30764	235.675	6.67789	260.751
61	11	15.621	52.9708	3.71891	263.613	27.9372	304.773
61	12	14.3678	58.8168	1.69577	290.562	26.9491	348.95
61	13	9.87388	61.1946	2.89415	304.116	13.554	389.133
61	14	14.3798	64.0583	2.65849	303.061	-1.05522	433.681
61	15	16.1545	63.58	3.32094	289.533	-13.5277	480.365
61	16	14.7436	68.3829	3.66678	317.217	27.6845	517.998
61	17	18.7306	70.7425	2.59997	320.755	3.53719	555.429
61	18	19.4856	72.9695	1.90636	336.653	15.8986	574.822
61	19	22.8171	75.8545	0.67567	15.8355	39.1823	590.526
61	20	24.7712	75.677	0.130917	119.078	103.243	588.527
61	21	24.7364	75.2359	0.0277926	263.768	144.69	588.001
61	22	24.7672	75.3014	0.0649967	85.7984	-177.97	592.589
61	23	24.5803	75.3338	0.171205	30.0144	-55.784	590.2
61	24	24.7273	75.3188	0.142866	38.1382	8.12381	590.032
61	25	24.7815	75.1069	0.160636	333.796	-64.3426	591.924
61	26	25.0251	75.0769	0.272898	343.055	9.25907	600.538
61	27	25.0644	75.0541	0.353641	322.26	-20.7946	612.869
61	28	25.2139	75.3197				617.639
61	29	25.8082	75.3155				626.619
61	30	25.9034	75.7035
62	1	29.3538	52.2134	0.0792603	168.963		9.03332
62	2	29.0673	52.1149	0.0350129	317.267	148.303	17.8423
62	3	29.1121	52.0901	0.0340453	292.961	-24.306	28.1042
62	4	29.1204	52.1679	0.0542252	46.5094	113.549	42.843
62	5	29.1444	52.1862	0.061176	42.537	-3.97244	55.1576
62	6	29.1519	52.1841	0.209377	45.1794	2.6424	69.0554
62	7	29.2324	52.0499	1.95328	12.9626	-32.2167	88.4909
62	8	29.2797	52.0621	2.97313	355.966	-16.9971	112.514
62	9	29.5947	51.7386	3.82609	313.36	-42.6053	139.754
62	10	34.9429	50.7354	3.23434	285.732	-27.6285	168.622
62	11	38.1769	52.6896	2.69563	251.134	-34.5975	201.031
62	12	37.4754	60.0839	1.27112	270.994	19.8602	236.561
62	13	37.5737	60.075	0.0988522	282.698	11.7041	272.708
62	14	35.562	60.3421	2.5441	318.163	35.4643	315.536
62	15	37.5416	63.8967	2.22223	330.858	12.695	347.555
62	16	37.6389	60.3643	3.20629	309.378	-21.4801	391.058
62	17	41.2484	65.433	1.47829	338.265	28.8873	424.103
62	18	43.3644	67.1432	0.67686	347.553	9.28766	456.654
62	19	43.7414	67.7995	1.14121	225.157	-122.396	492.543
62	20	45.368	67.0753	1.6905	218.804	-6.35237	510.797
62	21	45.3472	67.5809	1.64625	223.777	4.97243	518.832
62	22	41.3271	70.227	1.69261	208.063	-15.714	523.735
62	23	41.4158	70.2534	0.503828	293.211	85.1483	530.128
62	24	41.7812	70.9978	0.0733495	319.798	26.5873	532.8
62	25	36.8463	72.6158	1.7883	15.3104	55.5121	543.618
62	26	42.0115	71.6425	0.123786	315.57	-59.7403	543.55
62	27	41.9493	71.1398	0.25387	294.584	-20.9863	549.913
62	28	42.0208	71.1992				558.826
62	29	42.2767	71.9025				551.633
62	30	42.2662	71.8324
63	1	37.1217	52.2105	3.47709	303.544		11.7258
63	2	40.6128	51.6431	2.62247	285.26	-18.284	28.4516
63	3	42.225	58.5033	0.557023	287.313	2.05349	42.1543
63	4	42.8857	60.9045	0.0376141	251.768	-35.5456	52.9599
63	5	42.6835	59.2331	2.79202	290.002	38.2345	76.12
63	6	42.7223	60.0987	2.60845	292.094	2.09173	117.581
63	7	42.8504	61.0117	2.26805	294.609	2.51479	161.003
63	8	45.5486	67.1039	1.59639	222.085	-72.5236	183.525
63	9	45.6656	67.3494	1.60333	217.832	-4.25309	218.392
63	10	45.6838	67.1979	1.64207	216.007	-1.82547	278.576
63	11	41.9943	70.3138				345.671
63	12	41.8666	70.2996				340.766
63	13	41.6987	70.0939
64	1	40.6941	51.7165	3.02143	315.649		12.3294
64	2	45.6508	54.7798	2.57415	285.141	-30.5082	29.5389
64	3	45.7247	54.6334	4.01842	267.571	-17.5696	55.5082
64	4	47.1757	58.0529	2.94804	257.558	-10.0137	90.9228
64	5	47.6678	62.2342	3.23442	234.996	-22.5614	133.573
64	6	45.2138	66.6778	1.59593	228.769	-6.22748	177.416
64	7	45.2702	66.6893	1.58966	229.853	1.08393	234.167
64	8	42.1017	70.1822	1.92087	187.798	-42.0542	302.805
64	9	42.0582	70.2785	3.41392	225.772	37.9731	379.283
64	10	42.1953	70.3347	3.47128	227.496	1.72411	452.614
64	11	36.3924	70.9641	2.67565	245.561	18.0652	543.774
64	12	34.9144	77.6174	1.59482	177.151	-68.41	615.909
64	13	35.1593	78.012	1.6176	178.128	0.976754	678.94
64	14	33.0715	78.2719	1.02891	166.381	-11.7464	755.695
64	15	30.1358	77.3796	0.822558	197.19	30.8089	817.684
64	16	30.309	77.8535	1.05022	243.427	46.2366	868.227
64	17	30.0715	77.5451				907.172
64	18	27.7784	78.1089				977.488
64	19	28.8996	80.6713
65	1	0.077938	52.7679	3.09331	299.042		7.66923
65	2	2.85004	55.757	1.84405	289.103	-9.9395	20.2762
65	3	4.58901	60.7218	0.0876675	306.01	16.9077	31.1736
65	4	4.5829	60.881	1.46793	0.759917	54.7497	44.0191
65	5	4.66049	60.9845	3.26768	322.124	-38.6362	61.4669
65	6	4.74363	60.9346	3.23466	322.521	0.39705	85.9189
65	7	8.9863	60.8226	2.43551	303.498	-19.0229	111.815
65	8	12.3984	67.0032	0.259971	12.8381	69.3403	131.141
65	9	12.4445	66.8392	0.204648	350.092	-22.7458	155.303
65	10	13.0188	66.9156	0.013446	292.408	-57.684	178.74
65	11	13.1588	66.8299	0.794112	207.164	-85.2439	201.243
65	12	13.0492	66.9448	0.332442	139.029	-68.1359	228.277
65	13	13.0342	66.9529	0.351745	135.587	-3.44151	258.546
65	14	11.0393	67.9175	1.1598	355.387	-140.2	291.52
65	15	12.2962	66.2909	2.06985	312.527	-42.8606	328.608
65	16	12.2804	66.2144	2.08537	311.662	-0.864589	378.146
65	17	14.5074	68.1973	1.51461	327.438	15.7759	432.076
65	18	16.4935	70.8671	1.75208	296.41	-31.0282	482.615
65	19	16.4391	70.8882	3.46973	294.202	-2.20743	548.999
65	20	18.337	70.6429	3.45011	284.028	-10.1749	631.935
65	21	18.8314	75.5748	1.82122	290.255	6.22761	716.006
65	22	20.7065	80.3825	0.27814	243.238	-47.0171	784.631
65	23	20.8458	80.6846	0.431215	279.677	36.4391	868.204
65	24	20.7229	80.7006	0.505619	310.29	30.6125	924.542
65	25	20.3307	81.1275	0.803611	312.322	2.03192	983.689
65	26	21.0632	81.9598	1.72999	250.446	-61.8756	1056.83
65	27	21.7038	81.8576	1.893	247.542	-2.90395	1181.62
65	28	21.9539	82.91				1396.62
65	29	19.3262	86.8504				1557.65
65	30	19.5344	87.1059
66	1	14.295	52.563	1.63659	212.757		15.2385
66	2	14.274	52.8611	1.55314	210.905	-1.85168	39.6398
66	3	10.009	55.2387	1.9387	261.862	50.9567	65.4942
66	4	10.166	55.2196	3.20282	304.022	42.1607	94.2114
66	5	10.2761	55.2542	3.34877	304.154	0.132064	128.136
66	6	9.18563	60.9962	2.45795	339.299	35.1443	168.826
66	7	15.542	63.1833	1.61371	268.709	-70.59	225.267
66	8	15.9164	63.5678	1.45029	266.972	-1.73695	293.145
66	9	16.0834	63.6029	1.58195	262.716	-4.25594	366.274
66	10	15.4329	68.0231	0.075213	297.219	34.5032	443.305
66	11	15.6865	67.9126	1.15084	288.328	-8.89124	527.604
66	12	15.4816	68.3104	1.4671	319.691	31.363	630.958
66	13	15.5361	68.2238	2.83732	295.766	-23.9247	756.671
66	14	16.7721	71.19	3.21029	289.784	-5.98146	885.792
66	15	18.8379	71.1577	5.52274	263.016	-26.768	1021.01
66	16	19.2362	75.8895	3.92631	258.027	-4.98892	1150.99
66	17	20.032	80.2524	2.30791	261.049	3.02168	1282.84
66	18	16.8234	87.603	2.6785	351.685	90.6363	1384.7
66	19	16.7928	87.4122	3.97499	354.133	2.44777	1505.34
66	20	18.9548	87.0918	4.23656	321.16	-32.9734	1653.34
66	21	24.7745	88.7649	2.85808	291.014	-30.1458	1815.35
66	22	28.6553	88.6311	2.68347	264.058	-26.9558	1965.86
66	23	28.8543	95.0627	0.622748	237.291	-26.7676	2089.62
66	24	27.8492	96.7689	0.242763	55.3175	178.027	2246.68
66	25	27.8219	96.6383	0.0402776	251.98	-163.337	2394.72
66	26	27.8448	96.6347	3.274	259.893	7.91263	2488.19
66	27	28.2636	96.17	3.51671	257.811	-2.08154	2671.35
66	28	27.7846	96.7532				3020.78
66	29	26.1211	106.304				3045.15
66	30	26.0361	106.482
67	1	50.6297	54.1697	4.50474	245.907		13.8507
67	2	46.9185	57.8895	2.92701	257.555	11.6475	29.2199
67	3	46.9534	57.9412	4.41586	247.923	-9.63129	53.6793
67	4	45.113	66.5066	1.61722	229.811	-18.1123	73.2102
67	5	45.0261	66.4641	3.32099	208.345	-21.4658	100.247
67	6	41.9744	70.2175	1.90984	188.786	-19.5591	122.885
67	7	41.9822	70.2129	1.81369	187.894	-0.892392	151.824
67	8	36.2577	71.1944	1.4823	148.818	-39.0755	173.481
67	9	36.3121	71.0926	2.13407	160.406	11.5879	196.077
67	10	36.5927	70.9601	2.21493	161.78	1.37347	221.364
67	11	32.4532	68.892	0.676803	183.922	22.1426	249.248
67	12	30.2806	68.9457	0.540436	354.193	170.27	271.607
67	13	30.2811	68.8825	3.46385	299.082	-55.1103	307.445
67	14	30.4276	69.0309	3.45017	295.624	-3.4586	349.478
67	15	31.8936	69.1097	3.15578	275.166	-20.4579	407.866
67	16	35.3321	77.9639	0.851414	193.355	-81.8112	424.197
67	17	34.9038	78.3634	0.0362039	37.2659	-156.089	434.799
67	18	32.746	78.5386	0.874983	10.9314	-26.3344	432.685
67	19	32.8469	78.5538	0.939424	8.29236	-2.63907	432.411
67	20	34.9902	78.2977	1.78581	341.005	-27.2872	446.562
67	21	35.3233	78.0408	2.99254	313.207	-27.7985	489.76
67	22	35.6357	78.1474	3.02598	310.949	-2.25722	543.242
67	23	40.0559	80.0414	1.81528	284.139	-26.8107	620.066
67	24	41.4697	84.5845	0.265035	260.343	-23.7962	691.22
67	25	41.5853	85.0039	2.2545	322.965	62.6227	802.408
67	26	41.3862	85.3223	2.07616	327.838	4.87251	920.128
67	27	41.3363	85.3683	3.06501	303.447	-24.3904	1136.55
67	28	46.9844	89.0775				1219.84
67	29	46.6589	88.6378				1528.8
67	30	46.4044	93.0406
68	1	9.99426	55.3748	1.92237	261.572		13.4949
68	2	9.78637	55.2445	1.95453	262.895	1.32312	22.6537
68	3	9.18391	60.9626	2.22602	340.566	77.6711	33.4627
68	4	9.14897	61.0796	2.78339	310.577	-29.9887	49.9774
68	5	9.06111	61.063	2.945	311.419	0.841526	75.096
68	6	15.4815	63.1845	1.61523	265.745	-45.6739	90.9325
68	7	14.5805	67.4218	1.5874	273.416	7.67158	109.084
68	8	14.906	67.6884	1.59166	270.483	-2.93335	137.772
68	9	15.122	68.0168	1.63142	265.097	-5.38645	162.626
68	10	14.8643	72.1755	0.3406	254.424	-10.6726	188.195
68	11	14.9462	72.4632	1.47344	301.533	47.109	219.013
68	12	14.7036	72.8932	1.1224	244.147	-57.3862	254.814
68	13	14.59	73.1598	3.07021	248.867	4.71978	294.509
68	14	17.258	76.2308	2.75026	221.994	-26.8729	337.11
68	15	13.2353	75.9234	2.44914	234.307	12.3135	396.449
68	16	11.2692	81.751	0.707072	182.59	-51.7174	433.083
68	17	11.1259	81.7509	0.0638624	16.276	-166.314	481.222
68	18	8.94851	81.8906	2.38427	348.669	-27.6069	531.415
68	19	9.1501	81.8468	0.83157	3.84166	15.1726	589.453
68	20	11.3098	81.6972	1.84223	311.89	-51.9516	664.072
68	21	15.9619	83.296	1.04966	253.458	-58.4325	750.717
68	22	11.6392	81.6797	1.5735	336.435	82.977	845.868
68	23	15	85.8115	2.10053	253.166	-83.2682	925.018
68	24	15.0653	86.3146	1.92135	250.837	-2.32972	1048.04
68	25	15.966	83.5669	2.88758	250.934	0.0974398	1200.8
68	26	13.1751	91.843	0.0640894	327.555	76.6213	1259.61
68	27	13.1732	91.7593	2.0833	275.578	-51.9775	1361.46
68	28	13.1363	91.7545				1595.44
68	29	13.3374	91.9462				1829.5
68	30	13.7807	97.9796
69	1	3.1195	55.5494	3.56931	284.273		11.6435
69	2	4.65949	60.6466	1.84094	282.116	-2.15764	27.3721
69	3	5.81645	65.8203	0.175932	310.837	28.7217	37.9831
69	4	5.75949	65.9268	0.309418	338.538	27.7006	57.4118
69	5	5.81864	66.0464	0.374809	328.027	-10.5111	88.0141
69	6	6.16158	66.2196	0.251541	1.60886	33.5822	117.006
69	7	6.62337	66.2664	0.125185	5.00201	3.39315	142.195
69	8	6.77248	66.6419	1.71999	234.224	-130.778	176.842
69	9	6.91591	66.1985	1.83569	188.718	-45.5057	222.986
69	10	6.9975	66.2337	2.75237	221.559	32.8408	258.55
69	11	3.75588	70.8282	1.77359	252.32	30.7609	275.411
69	12	1.47245	67.0332	3.52555	264.195	11.8746	337.103
69	13	0.818929	71.7114	1.89226	267.074	2.87883	380.086
69	14	2.13996	75.8976	1.61256	281.125	14.0511	417.017
69	15	0.402643	77.5556	2.71007	290.948	9.8236	463.112
69	16	0.529104	77.3808	2.62638	286.792	-4.15577	537.845
69	17	3.07336	80.6444	1.62312	308.875	22.0823	621.808
69	18	3.30938	85.1484	1.76297	293.617	-15.258	684.028
69	19	2.80543	84.924	2.84019	292.999	-0.61791	810.524
69	20	6.12947	84.4353				1112.85
69	21	5.42821	89.9944				1394.26
69	22	6.13452	92.7673
70	1	16.0261	57.8415	1.68366	264.586		10.1781
70	2	15.8291	58.1773	1.63338	266.778	2.1917	28.4428
70	3	15.7432	62.9766	1.49991	255.68	-11.0979	48.4089
70	4	15.5495	62.87	2.7387	292.065	36.3849	73.5793
70	5	15.5537	63.0697	2.71088	294.078	2.01282	103.005
70	6	14.6303	67.3365	1.74006	325.636	31.5583	131.924
70	7	18.6359	70.4843	0.18672	359.301	33.665	161.806
70	8	18.8716	70.4948	0.12972	334.109	-25.1916	195.77
70	9	18.9394	70.283	0.284763	261.599	-72.5105	235.748
70	10	19.1961	70.4912	0.266573	243.835	-17.7633	280.15
70	11	19.2217	70.6647	0.786	312.093	68.2579	332.754
70	12	18.8145	71.1282	1.63267	275.019	-37.0745	396.563
70	13	18.8434	71.2089	3.03637	278.596	3.57683	480.481
70	14	20.8023	72.4145	5.09987	262.396	-16.1993	575.596
70	15	19.243	76.0074	5.59887	267.049	4.65291	669.259
70	16	20.2049	80.2157	4.1125	262.689	-4.36047	757.43
70	17	18.7779	87.5796	1.74685	292.562	29.8734	817.929
70	18	18.3784	92.7817	0.759203	1.65752	69.0953	851.039
70	19	18.6348	92.4529	2.1714	358.318	-3.33967	892.303
70	20	20.7886	92.419	1.48086	355.364	-2.95362	938.806
70	21	20.6551	92.7159	1.52335	358.344	2.97981	992.573
70	22	25.1462	92.6441	0.102091	353.639	-4.70545	1050.02
70	23	25.2167	92.7781	0.157368	358.84	5.2011	1130.43
70	24	25.2232	92.8479	0.251246	13.0638	14.2241	1252.35
70	25	25.4506	92.6781	0.176142	344.53	-28.5335	1369.01
70	26	25.6887	92.7876	1.64355	296.195	-48.3356	1465.51
70	27	25.9574	92.6775	4.11519	291.467	-4.72735	1634.78
70	28	25.9599	92.819				2009.86
70	29	27.8652	97.2119				2354.8
70	30	30.4755	104.167
71	1	37.197	59.8693	0.0705837	191.164		12.559
71	2	36.971	59.7112	0.164408	293.051	101.887	32.0495
71	3	37.0103	59.9177	0.0941225	323.002	29.9503	57.7445
71	4	36.9893	59.9103	0.0767414	305.133	-17.869	90.9383
71	5	37.1641	60.165	0.0409124	178.313	-126.82	131.845
71	6	37.2358	60.0876	0.0266233	314.154	135.841	172.774
71	7	37.1217	60.0986	2.25508	223.126	-91.0284	218.553
71	8	37.0415	60.1614	2.26083	223.423	0.297254	269.946
71	9	37.2914	60.1449	3.411	237.841	14.4179	318.263
71	10	32.1841	64.7233	2.44072	301.763	63.9219	377.684
71	11	32.1154	64.8236	2.26352	289.171	-12.5925	419.636
71	12	31.8447	68.8079	3.21498	289.19	0.0196432	466.285
71	13	36.0386	70.9489	4.81537	275.57	-13.62	525.913
71	14	34.3453	71.2376	4.88459	282.191	6.62032	606.28
71	15	35.0151	77.9169	2.68477	278.29	-3.90078	678.505
71	16	37.4408	85.3268	2.25929	186.047	-92.2431	689.384
71	17	37.4396	85.5609				705.265
71	18	36.1763	85.8871				727.147
71	19	30.7006	86.0407
72	1	9.16944	60.8419	3.9189	296.081		9.79977
72	2	11.7312	66.1311	2.01682	298.539	2.45862	21.7281
72	3	14.0033	71.255	1.28176	256.555	-41.9842	29.4708
72	4	14.3381	71.4015	1.33356	250.21	-6.34498	36.7852
72	5	14.6219	71.4464	1.43618	247.444	-2.76577	44.798
72	6	13.1092	74.9949	0.252104	257.565	10.1213	54.756
72	7	12.9836	75.1659	2.04088	250.714	-6.85108	65.9483
72	8	12.9692	75.4254	2.11322	253.702	2.98771	82.7778
72	9	12.9463	75.7334	2.05836	253.172	-0.530442	101.205
72	10	10.9614	80.945	0.338661	285.46	32.2879	106.824
72	11	11.1901	81.5103	0.628946	190.295	-95.1649	116.3
72	12	11.1586	81.6441	1.16946	163.683	-26.6113	126.609
72	13	11.2322	81.9242	1.20282	154.347	-9.33584	133.73
72	14	9.3336	81.8475	0.859098	142.979	-11.3681	133.095
72	15	7.79153	80.6584	1.97336	54.3784	-88.601	143.28
72	16	7.97941	80.362	1.6559	60.5951	6.21676	153.098
72	17	7.27583	80.2957	0.0456623	37.8333	-22.7619	164.523
72	18	11.2396	75.8461	1.97867	229.287	-168.547	202.819
72	19	10.4184	76.0343	3.12399	215.865	-13.4212	276.644
72	20	7.38403	80.2116				349.982
72	21	7.36764	80.3455				468.072
72	22	2.82344	81.5252
73	1	42.7049	60.7736	3.99426	237.775		8.12614
73	2	37.7339	66.6154	1.51297	254.325	16.5503	14.7786
73	3	37.6972	66.7185	1.57202	252.058	-2.26709	26.0815
73	4	36.3151	70.9105	0.142885	269.06	17.0023	35.0516
73	5	36.5076	70.9855	2.29124	248.418	-20.642	45.9513
73	6	36.2444	71.2052	2.19448	251.644	3.22613	58.8662
73	7	36.308	71.3391	4.35575	286.369	34.7246	76.8302
73	8	33.9792	77.3774	3.00231	314.135	27.7659	86.899
73	9	34.1711	77.4536	3.04714	314.245	0.110257	97.5667
73	10	39.9907	83.8767	0.253325	337.909	23.6642	99.843
73	11	40.2512	83.8417	1.02543	66.3682	88.4588	102.591
73	12	40.5494	84.0022	1.41438	48.3007	-18.0675	104.815
73	13	40.6949	84.1625	1.54798	49.2105	0.909753	103.952
73	14	41.4844	81.0234	0.72613	9.36386	-39.8466	110.461
73	15	43.372	80.8341	0.646134	182.753	173.39	117.863
73	16	43.7287	80.6465	0.651753	188.059	5.30524	126.893
73	17	43.6337	80.6689	0.134582	329.902	141.844	136.773
73	18	41.4359	80.9272	0.880944	1.93391	32.0317	148.688
73	19	41.7927	80.9206	0.805756	5.36696	3.43304	161.256
73	20	43.9831	80.8714	0.101357	345.386	-19.9814	176.613
73	21	44.0772	80.838	0.0305228	90.7284	105.343	197.724
73	22	44.1994	80.6945	0.125185	246.12	155.392	210.621
73	23	44.2773	80.9481	0.160766	213.176	-32.9448	232.514
73	24	44.076	80.7464	0.230414	251.407	38.2318	248.346
73	25	44.0474	81.0379	0.128509	292.519	41.1119	268.327
73	26	43.8736	81.212	0.14015	310.45	17.9305	296.796
73	27	43.8556	81.4016	1.3059	249.897	-60.5524	350.457
73	28	44.195	81.394				398.378
73	29	44.1464	81.532				590.872
73	30	42.5091	85.0806
74	1	15.8378	62.8767	1.59164	246.728		12.1209
74	2	15.8058	62.8441	1.55757	255.343	8.61522	20.8547
74	3	14.5223	67.1155	1.43699	274.166	18.8221	29.2597
74	4	13.9513	67.2631	1.44014	281.695	7.52925	44.2948
74	5	14.6235	67.3648	1.41046	271.867	-9.82772	61.8163
74	6	14.8355	71.4151	0.183699	250.284	-21.583	80.8156
74	7	14.827	71.4939	1.58478	249.694	-0.590467	104.714
74	8	14.7614	71.5939	1.64918	251.41	1.71661	129.062
74	9	14.6496	71.9339	1.59856	249.108	-2.3025	163.178
74	10	13.1771	75.9527	0.202038	258.571	9.46275	200.352
74	11	13.1842	76.2833	0.778269	194.937	-63.6331	234.055
74	12	12.9394	76.4143	1.84386	251.926	56.989	278.156
74	13	13.057	76.5468	3.77354	262.816	10.8898	345.577
74	14	10.9283	76.8852	3.01153	271.056	8.23961	405.519
74	15	11.2233	81.673	3.91462	270.834	-0.222058	470.962
74	16	11.6413	87.7786	0.439293	252.874	-17.9594	522.539
74	17	11.0947	85.9182	0.210213	326.5	73.6254	569.71
74	18	11.3942	93.4156	0.998496	19.3325	52.8327	590.412
74	19	11.2532	89.038	1.44639	311.283	-68.0498	640.575
74	20	11.6206	86.2663	2.02017	289.471	-21.8115	714.721
74	21	14.2207	92.4239	0.347547	149.529	-139.942	778.106
74	22	14.1161	92.2988	0.325979	153.156	3.62718	830.274
74	23	13.6408	91.9802	1.99729	272.028	118.872	896.826
74	24	13.3221	91.8952	1.995	273.47	1.44138	993.789
74	25	13.2435	91.8572	1.97884	274.345	0.875478	1139.12
74	26	13.8529	97.9683	0.073295	132.42	-141.925	1191.18
74	27	13.6843	97.8692	2.58198	307.923	175.503	1274.56
74	28	13.6933	97.7766				1461.85
74	29	13.7045	97.806				1696.24
74	30	18.445	103.979
75	1	22.769	63.2924	0.139959	172.852		6.0246
75	2	22.6429	63.942	0.268096	112.096	-60.756	14.4202
75	3	22.3773	63.9354	0.258651	93.9926	-18.1033	25.8967
75	4	22.3524	63.2402	0.534163	289.345	-164.647	39.1328
75	5	22.3404	63.1968	0.548717	273.586	-15.7588	51.0857
75	6	22.3232	63.1613	1.39497	323.615	50.0281	68.0922
75	7	22.8832	64.7522	1.09495	343.675	20.0603	81.1222
75	8	22.4434	64.8397	1.24455	347.941	4.26631	96.3766
75	9	25.6923	65.6439	0.107568	351.95	4.00921	111.42
75	10	26.0356	65.6755	0.0612722	223.761	-128.19	129.441
75	11	26.0946	65.6197	1.39682	301.4	77.6395	151.225
75	12	26.0118	65.6891	1.79109	320.536	19.1361	178.262
75	13	25.9029	65.8027	2.44397	333.291	12.755	203.994
75	14	28.2779	69.1965	1.21679	356.061	22.77	228.718
75	15	30.1601	69.1043	0.240773	239.737	-116.325	256.073
75	16	32.4525	69.098	1.26728	300.398	60.6611	284.945
75	17	31.9196	69.4472	1.7922	324.817	24.4191	320.352
75	18	29.7961	69.7282	2.40875	336.234	11.4174	350.293
75	19	34.3762	72.3773	0.779325	349.773	13.5385	373.05
75	20	36.314	72.5452	0.219338	331.88	-17.8926	395.781
75	21	36.4095	72.6403	0.154784	345.941	14.061	423.543
75	22	36.677	72.7924	1.8189	264.813	-81.1278	457.561
75	23	36.8944	72.8553	1.87906	262.473	-2.3403	489.418
75	24	36.86	72.7531	3.18514	238.104	-24.3691	534.805
75	25	36.1837	78.2267	3.1626	238.615	0.511467	556.009
75	26	36.1559	78.4439	3.3703	238.089	-0.526504	587.729
75	27	31.8111	80.8658	3.14975	258.688	20.5987	648.562
75	28	31.2427	86.3264				683.693
75	29	30.8113	87.0267				772.006
75	30	29.9575	90.1314
76	1	32.4229	64.0101	0.137448	230.867		13.5593
76	2	32.3661	64.0298	0.14972	256.683	25.8156	34.15
76	3	32.0513	64.1604	0.186446	275.302	18.6193	61.1003
76	4	32.1627	64.3299	0.131242	262.724	-12.5779	96.486
76	5	32.2626	64.4668	0.151965	279.637	16.9125	139.84
76	6	32.103	64.7173	0.0972567	292.433	12.7964	195.062
76	7	32.1128	64.7205	1.37211	274.79	-17.6431	259.168
76	8	32.3389	64.9163	1.5331	242.247	-32.5427	329.784
76	9	32.2143	64.987	3.46351	209.422	-32.8246	411.59
76	10	32.4565	68.8224	3.03819	221.672	12.2499	497.889
76	11	30.1972	68.9865	3.29563	224.832	3.15938	591.679
76	12	23.164	70.0913	3.54251	253.519	28.6871	693.902
76	13	25.6483	74.8825	4.82413	240.939	-12.5795	810.643
76	14	23.1856	75.9571	5.5374	261.17	20.2303	939.983
76	15	20.1489	80.2822	4.41909	283.333	22.1635	1063.46
76	16	18.6186	87.5329	2.43376	309.191	25.8576	1154.99
76	17	20.6355	92.3723	1.54699	352.336	43.1448	1236.61
76	18	23.2062	93.1821	0.678311	7.44514	15.1096	1327.78
76	19	23.2323	93.1917	1.86254	317.286	-50.1594	1397.09
76	20	25.235	92.9913	1.47706	304.729	-12.5572	1489.96
76	21	25.224	92.9185	4.30216	294.086	-10.6423	1603.8
76	22	27.3378	96.982	2.64901	292.062	-2.02466	1675.5
76	23	27.7594	96.6331	3.01569	293.66	1.59865	1770.66
76	24	30.4913	104.701	0.314694	63.9786	130.318	1799.17
76	25	30.3227	104.347	0.332548	106.942	42.9638	1845.12
76	26	31.3901	104.92	2.10058	281.127	174.185	1898.33
76	27	30.9055	103.853	2.67801	282.153	1.0264	2011.21
76	28	30.032	103.393				2245.46
76	29	32.6063	111.103				2275.01
76	30	32.5969	111.707
77	1	5.81248	65.5006	2.71213	296.167		9.48655
77	2	5.83394	65.7482	2.92836	295.3	-0.867348	21.6154
77	3	9.72857	70.2706	3.16973	247.722	-47.5776	33.1894
77	4	9.40052	72.8032	2.3966	242.12	-5.60236	44.5562
77	5	9.58825	73.6907	2.19346	236.131	-5.98841	56.6924
77	6	6.12363	79.07	0.376855	310.291	74.1593	67.1959
77	7	6.03838	79.1584	0.350142	310.058	-0.232197	79.432
77	8	5.92104	79.1545	0.445182	307.761	-2.29747	97.6003
77	9	6.85472	79.9323	0.225471	277.575	-30.1857	124.105
77	10	6.7144	79.9624	2.75283	234.267	-43.3081	156.304
77	11	6.73889	80.2103	3.86445	256.61	22.3429	189.476
77	12	6.94389	80.6028	3.59918	262.908	6.29773	229.319
77	13	1.89139	86.6662	1.98177	309.652	46.7443	263.29
77	14	4.05412	91.4885	0.400495	15.6175	65.9655	287.444
77	15	5.61075	91.3178	0.825144	182.975	167.358	314.718
77	16	5.68523	91.2437	0.866942	169.503	-13.4728	347.581
77	17	5.21125	91.1651	0.28585	74.8533	-94.6494	396.981
77	18	3.13865	91.4463	1.14578	335.571	-99.2824	447.683
77	19	3.12794	90.7699	2.10146	274.87	-60.7005	493.028
77	20	5.43532	90.3373	2.19381	255.26	-19.6099	550.654
77	21	6.26826	92.8678	1.48649	229.91	-25.3502	604.914
77	22	3.66319	97.0515	0.32411	119.433	-110.477	642.212
77	23	3.76084	96.7022	0.201026	142.235	22.8021	688.555
77	24	3.39643	96.2795	0.0890488	272.54	130.305	756.473
77	25	3.18539	96.2047	0.371713	295.657	23.1169	866.008
77	26	3.28409	96.3328	0.501846	281.405	-14.2517	952.979
77	27	3.40827	96.5464	2.85631	281.403	-0.00285516	1088.94
77	28	3.66822	97.2098				1292.9
77	29	3.58181	97.8086				1556.45
77	30	5.10235	104.946
78	1	12.1818	65.9767	2.51267	326.954		10.4965
78	2	14.566	67.0975	1.6563	321.938	-5.01562	34.2677
78	3	18.4112	70.1511	0.0983726	346.559	24.6213	59.7843
78	4	18.5003	70.0873	1.45804	278.788	-67.7711	83.826
78	5	18.4783	70.1609	1.54058	278.67	-0.118206	108.858
78	6	18.6982	70.2197	1.55915	275.146	-3.52408	132.599
78	7	19.1686	74.41	0.300778	278.603	3.45678	148.757
78	8	19.175	74.7298	0.297616	262.956	-15.6471	171.601
78	9	19.1177	74.8783	0.39708	268.119	5.16281	203.746
78	10	19.3036	75.3022	0.257954	253.49	-14.6282	246.086
78	11	19.0655	75.6159	1.7337	257.615	4.12496	298.274
78	12	19.0786	76.0689	3.86484	265.315	7.69982	364.709
78	13	19.0837	76.0442	5.40796	274.734	9.4184	458.102
78	14	17.95	80.696	4.79477	301.526	26.7925	550.033
78	15	18.1316	87.6247	3.67266	341.8	40.274	639.155
78	16	20.4226	92.2127	2.49325	18.4837	36.6836	715.524
78	17	25.4713	92.9572				791.99
78	18	28.5984	91.066				804.678
78	19	27.5165	89.8414
[truncated: 10,897 more rows]
